1 **USP10 strikes down  $\beta$ -catenin by dual-wielding**  
2 **deubiquitinase activity and phase separation potential**

3

4 Yinuo Wang<sup>1,#</sup>, Aihua Mao<sup>2,3,#</sup>, Jingwei Liu<sup>4,#</sup>, Pengjie Li<sup>5,#</sup>, Shaoqin Zheng<sup>1</sup>, Tong  
5 Tong<sup>1</sup>, Zexu Li<sup>1</sup>, Haijiao Zhang<sup>1</sup>, Lanjing Ma<sup>1</sup>, Jiahui Lin<sup>1</sup>, Zhongqiu Pang<sup>1</sup>, Qing  
6 Han<sup>1</sup>, Fukang Qi<sup>5</sup>, Xinjun Zhang<sup>6</sup>, Maorong Chen<sup>7</sup>, Xi He<sup>7</sup>, Xi Zhang<sup>8</sup>, Teng Fei<sup>1</sup>, Bi-  
7 Feng Liu<sup>5</sup>, Daming Gao<sup>9</sup>, Liu Cao<sup>4,\*</sup>, Qiang Wang<sup>2,\*</sup>, Yiwei Li<sup>5,\*</sup>, Ren Sheng<sup>1,10,\*</sup>

8

9 <sup>1</sup>College of Life and Health Science, Northeastern University, Shenyang 110819,  
10 China.

11 <sup>2</sup>Division of Cell, Developmental and Integrative Biology, School of Medicine, South  
12 China University of Technology, Guangzhou 510006, China.

13 <sup>3</sup>Guangdong Provincial Key Laboratory of Marine Biotechnology, Institute of Marine  
14 Sciences, Shantou University, Shantou, Guangdong 515063, China.

15 <sup>4</sup>College of Basic Medical Science, China Medical University, Shenyang 110122,  
16 China.

17 <sup>5</sup>Key Laboratory for Biomedical Photonics of MOE at Wuhan National Laboratory for  
18 Optoelectronics - Hubei Bioinformatics and Molecular Imaging Key Laboratory,  
19 Department of Biomedical Engineering, College of Life Science and Technology,  
20 Huazhong University of Science and Technology, Wuhan 430074, China.

21 <sup>6</sup>Key Laboratory of Molecular Biophysics of the Ministry of Education, National  
22 Engineering Research Center for Nanomedicine, College of Life Science and  
23 Technology, Huazhong University of Science and Technology, Wuhan 430074, China.

24 <sup>7</sup>F.M Kirby Neurobiology Center, Boston Children's Hospital, Department of  
25 Neurology, Harvard Medical School, Boston, MA 02115, USA.

26 <sup>8</sup>College of Sciences, Northeastern University, Shenyang 110004, China.

27 <sup>9</sup>State Key Laboratory of Cell Biology, CAS Center for Excellence in Molecular Cell  
28 Science, Shanghai Institute of Biochemistry and Cell Biology, Chinese Academy of  
29 Sciences, Shanghai 200031, China.

30 <sup>10</sup>Lead contact

31 #These authors share equal contribution

32 \*Correspondence: shengren@mail.neu.edu.cn (R.S.); yiweili@hust.edu.cn (Y.L.);  
33 qiangwang@scut.edu.cn (Q.W.); lcao@cmu.edu.cn (L.C.)

34

## 35 **Abstract**

36 **Wnt/ $\beta$ -catenin signaling is a conserved pathway crucially governing**  
37 **development, homeostasis and oncogenesis. Discovery of novel regulators holds**  
38 **great values in both basic and translational research. Through screening, we**  
39 **identified a deubiquitinase (DUB) USP10 as a novel and critical modulator of  $\beta$ -**  
40 **catenin. Mechanistically, USP10 binds to key scaffold Axin1 via conserved motifs**  
41 **and stabilizes Axin1 through K48-linked deubiquitination, and surprisingly,**  
42 **tethers Axin1 and  $\beta$ -catenin physically while promoting phase separation for  $\beta$ -**  
43 **catenin suppression regardless of its enzymatic activity. Functionally, USP10**  
44 **prominently regulates embryonic development and intestinal homeostasis by**  
45 **antagonizing  $\beta$ -catenin via DUB activity. In colorectal cancer, USP10**  
46 **substantially represses cancer growth mainly through physical binding**  
47 **compensation and phase separation promotion and correlates with Wnt/ $\beta$ -**  
48 **catenin magnitude clinically. Collectively, we discovered USP10 functioning in**  
49 **multiple biological processes against  $\beta$ -catenin and unearthed a novel enzyme-**  
50 **dependent and -independent “dual-regulating” mechanism by which USP10**  
51 **utilizes parallelly and context-dependently. USP10 inhibitor was suggested in**  
52 **treating certain Wnt-related diseases.**

53

54 **Key words:** USP10, ubiquitination, phase separation,  $\beta$ -catenin, colorectal cancer.

55

## 56 **Introduction**

57 Wnt/ $\beta$ -catenin signaling (aka canonical Wnt signaling) is a pivotally conserved  
58 signaling cascade in metazoans.<sup>1,2</sup> In vertebrate, Wnt/ $\beta$ -catenin signaling critically  
59 governs multiple biological processes including embryonic development and adult  
60 tissue homeostasis. Mechanistically, in the absence of Wnt ligand, co-transcription  
61 factor  $\beta$ -catenin is contained within the “destruction complex” primarily composed by  
62 Axin1 and APC (*Adenomatous Polyposis Coli*), therefore undergoes phosphorylation  
63 by GSK3 (Glycogen Synthase Kinase 3)/CK1 (Casein Kinase 1) and ends up with  
64 ubiquitination and proteasomal degradation. While Wnt ligand is present, it binds and  
65 recruits (co-)receptors to form signalosome on the plasma membrane and disrupts the  
66 presence of Axin1 and GSK3 in the destruction complex. As a result,  $\beta$ -catenin  
67 becomes released from its confinement, then translocating into the nucleus to initiate  
68 the expression of target genes that regulate cell proliferation, differentiation, and self-  
69 renewal. Dysregulation of Wnt/ $\beta$ -catenin signaling causes severe developmental  
70 disorders, degenerative diseases and malignant tumors, in particular colorectal cancers  
71 (CRC).<sup>1,2</sup> Though the core of this signaling cascade has been studied for decades,  
72 discovery of new regulators is still of great value for both basic and translational  
73 medicine. For instance, as novel findings, Rspo and Notum greatly expanded the  
74 mechanistic understanding of Wnt signaling regulation, as the antibody or inhibitor  
75 against them has been proven promising for particular cancer treatments.<sup>3-9</sup>  
76 As a central component of Wnt/ $\beta$ -catenin signaling, Axin1 is indispensable for both  
77 Wnt activation and  $\beta$ -catenin suppression.<sup>1</sup> It contains RGS domain for APC  
78 engagement, a conserved helix for  $\beta$ -catenin binding and DIX domain for  
79 multimerization with Dishevelled, while the majority remains unstructured  
80 (presumably intrinsically-disordered). However, thanks to this flexibility, Axin1 has  
81 been shown capable of either undergoing phase separation or polymerization, which  
82 effectively facilitates the entrapment of  $\beta$ -catenin within the destruction complex.<sup>10</sup>  
83 Regulation of Axin1 critically depends on the post-translational modifications (PTM).  
84 For instance, the phosphorylation at S497 allows Axin1 to obtain an “open”

85 conformation to make full contact with  $\beta$ -catenin.<sup>11</sup> Tankyrase (TNKS) can regulate  
86 the protein stability by poly-ribosylating Axin1 amino-terminal, which allows Axin1  
87 subsequent ubiquitination by RNF146 for degradation.<sup>12-14</sup> Despite that the potential  
88 toxicity is concerned, TNKS inhibitor such as XAV939, shows promise in treating  
89 Wnt-dependent diseases by regulating Axin1 protein level.<sup>12</sup> Other regulators of  
90 Axin1 post-translational modification were also reported, which play important roles  
91 in Wnt signaling transduction.<sup>15-19</sup>

92 Ubiquitination is a protein PTM that rules cellular protein degradation and activities.<sup>20</sup>  
93 By dynamic elongation or removal of K48-linked ubiquitin chain, the fate of protein  
94 can be decided for degradation or preservation, which is crucially required for cellular  
95 protein homeostasis. Additionally, other residues-linked (K63, K27, and etc.)  
96 ubiquitination were known to affect the protein activity. As one of the well-studied  
97 deubiquitinases (DUBs), USP10 has been shown to regulate multiple important  
98 biological processes.<sup>21</sup> It was reported that USP10 deubiquitinates substrates  
99 including FLT3, PTEN, KLF4 and YAP/TAZ to regulate cancer growth.<sup>22-25</sup> Other  
100 literatures also show that USP10 can deubiquitinate p53, VPS34 complex, NOTCH  
101 and AMPK in various biological conditions.<sup>26-29</sup> The small molecule inhibitor of  
102 USP10, Spautin-1, has been shown for translational medical potentials in treating  
103 various diseases.<sup>27,30</sup>

104 In this study, we have identified USP10 as a critical suppressor of Wnt/ $\beta$ -catenin  
105 signaling through cDNA screening. Notably, USP10 dominates Wnt/ $\beta$ -catenin  
106 signaling via dual paths. USP10 can directly associate with both  $\beta$ -catenin and Axin1  
107 via conserved motifs and remarkably stabilize Axin1 through K48-specific  
108 deubiquitination. And unexpectedly, USP10 can also corroborate the puncta formation  
109 of Axin1 through physical constraining-mediated phase separation, which is  
110 independent of its DUB activity. In terms of biological functions, we find that USP10  
111 plays crucial roles in embryonic development and intestinal homeostasis by  
112 modulating the amplitude of Wnt/ $\beta$ -catenin signaling via DUB activity. And in human  
113 CRC, USP10 significantly represses tumor progression mainly through enzymatic-

114 independent function both *in vitro* and *in vivo*, and correlates with patient survival and  
115 Wnt magnitude clinically. Thus, the Axin1-stabilizing and phase separating paths  
116 work parallelly and context-dependently. Taken together, we have identified that  
117 USP10 directly regulates Wnt/ $\beta$ -catenin signaling for the first time and revealed a  
118 novel DUB-dependent and -independent “dual-wielding” mechanism. By employing  
119 multiple biological models, we have elucidated the functional significance of USP10  
120 on Wnt regulation, and suggest the therapeutic promise for treating developmental  
121 and regenerative defects by using USP10 inhibitor.

122

## 123 **Results**

### 124 **USP10 is a negative regulator of Wnt/ $\beta$ -catenin signaling**

125 We performed DUBs cDNA screening under Wnt3a conditioned medium (CM)  
126 stimulation by exercising TOPFlash reporter (B/R system) in HEK293T cells as  
127 readout to identify novel DUBs that potentially regulate Wnt/ $\beta$ -catenin signaling. To  
128 obtain reliable results, we used two different transfection levels of cDNA as two  
129 independent experiment sets and included stringent controls in the screen. Amongst  
130 the initially screened 30 DUBs, we found that USP10 had a strong inhibitory effect on  
131 Wnt/ $\beta$ -catenin signaling which was comparable to that of Axin1 (**Fig.1A; S1A**). This  
132 inhibitory effect of ectopically expressed USP10 on Wnt/ $\beta$ -catenin signaling was then  
133 validated in human CRC cells such as RKO and DLD-1 (**Fig.S1B-C**). To further  
134 consolidate the results, we showed that USP10 inhibited Wnt/ $\beta$ -catenin signaling in a  
135 dose-dependent manner presented by both the luciferase assay and cytosolic  $\beta$ -catenin  
136 level (**Fig.1B-C**). Knockout or knockdown of USP10, on the contrary, activated  
137 Wnt/ $\beta$ -catenin signaling as shown in various assays, including TOPFlash reporter and  
138 the accumulation of cytoplasm  $\beta$ -catenin (**Fig.1D-E; S1D-H**). To exclude the  
139 possibility that USP10 affects Wnt/ $\beta$ -catenin through other related pathways, we  
140 employed dual-luciferase chemiluminescence to detect the changes of target genes  
141 including TGF $\beta$ , BMP, CREB and etc. The result showed that expression of USP10

142 had little effect on these pathways, thus strongly suggested that USP10 exerts  
143 suppression on Wnt/ $\beta$ -catenin directly (**Fig.S1I**).

144 Next, we sought to elucidate the mechanism. To effectively unravel the complexity of  
145 Wnt/ $\beta$ -catenin signaling, we first used GSK3 inhibitor CHIR99021 to divide Wnt/ $\beta$ -  
146 catenin cascade into the upstream (Wnt signalosome formation) and the downstream  
147 events<sup>31-33</sup> ( $\beta$ -catenin destruction complex formation and afterwards) (**Fig.1F**). After  
148 treatment of CHIR99021, USP10 still showed significant inhibition on Wnt/ $\beta$ -catenin  
149 signaling that was comparable to Axin1, indicating that the manner of USP10  
150 functioning was independent of Wnt signalosome formation (**Fig.1G**). Meanwhile, we  
151 constructed the N-terminal truncated  $\beta$ -catenin ( $\Delta$ N- $\beta$ -catenin), a mutant commonly  
152 used as the constitutively active variant due to absence of GSK3 and CK1  
153 phosphorylation sites.<sup>34</sup> By comparing the wild-type (WT)  $\beta$ -catenin and  $\Delta$ N- $\beta$ -  
154 catenin, we showed that USP10 was only able to effectively inhibit Wnt/ $\beta$ -catenin  
155 signaling during WT  $\beta$ -catenin overexpression but not  $\Delta$ N- $\beta$ -catenin, which indicated  
156 that USP10 could not significantly affect  $\beta$ -catenin nuclear transportation (**Fig.1H;**  
157 **S1J**). Taken together, we have identified USP10 as a novel negative regulator of  
158 Wnt/ $\beta$ -catenin signaling and argued that USP10 functions at the  $\beta$ -catenin destruction  
159 complex level.

160

### 161 **USP10 stabilizes Axin1 through K48-linked deubiquitination**

162 Next, we examined the interaction of USP10 with the key components of the  
163 destruction complex (including  $\beta$ -catenin, Axin1, APC, GSK3 and  $\beta$ -Trcp). By  
164 employing co-immunoprecipitation (co-IP), we found that USP10 co-existed with  $\beta$ -  
165 catenin, Axin1 and GSK3 in the same complex at both exogenous and endogenous  
166 levels (**Fig.2A; S2A**). Since USP10 was a repressor of Wnt/ $\beta$ -catenin signaling, we  
167 intuitively focused on Axin1 and logically hypothesized that USP10 might regulate  
168 Axin1 ubiquitination and stability. We first showed that endogenous Axin1 protein  
169 level could be upregulated upon treatment of the proteasome inhibitor MG132  
170 (**Fig.2B**). At the presence of ectopic USP10, the stability of Axin1 was enhanced

171 regardless of MG132 while Axin1 transcription level remained unaltered (**Fig.2B;**  
172 **S2B**). Interestingly, the presence of USP10 showed even higher Axin1 protein level  
173 than protease inhibitor, which suggested USP10 might have other functions beyond  
174 Axin1 deubiquitination. This Axin1-increasing effect was also dose-dependent on  
175 USP10 level (**Fig.S2C**). To check the protein stability of Axin1, pulse-chase assay  
176 was exercised by blocking the *de novo* protein synthesis and observing the turnover of  
177 the existing protein. We found that USP10 overexpression enhanced endogenous  
178 Axin1 stability, as USP10 depletion showed the opposite effect (**Fig.2C; S2D-E**). The  
179 inhibitory effect of USP10 on Wnt/ $\beta$ -catenin was strongly attenuated when Axin1 was  
180 knocked-down, indicating that USP10 regulates Wnt/ $\beta$ -catenin signaling mainly  
181 through Axin1 (**Fig.2D; S2F**).

182 In terms of Axin1 ubiquitination, USP10 depletion resulted in aggravated Axin1  
183 ubiquitination, which could be recovered by USP10 rescue (**Fig.2E; S2G**). It was  
184 further confirmed that Axin1 was a direct substrate of USP10 via *in vitro*  
185 deubiquitination assay (**Fig.S2H**). Moreover, USP10 mainly removed K48-linked  
186 ubiquitination on Axin1, which was consistent with its regulation on Axin1 stability  
187 (**Fig.2F**). The effect was lost when we employed USP10-CA (USP10 C424A,  
188 enzymatically-dead mutant)<sup>27</sup>, suggesting USP10 deubiquitinates Axin1 based on its  
189 DUB activity (**Fig.2G; S2H-I**). Based on the binding results, we also showed USP10  
190 could not deubiquitinate  $\beta$ -catenin (**Fig.S2J**). This result brought clear evidence that  
191 USP10 serves unambiguously as Wnt/ $\beta$ -catenin antagonist, unlike another DUB,  
192 USP7, which was contradictorily reported to stabilize both Axin1 and  $\beta$ -catenin.<sup>15,35</sup>  
193 On the other hand, we employed the USP10 inhibitor Spautin-1 to validate our results  
194 through chemical perturbation. The addition of Spautin-1 enhanced the ubiquitination  
195 of Axin1, destabilized Axin1 and inhibited the activity of the Wnt/ $\beta$ -catenin, which  
196 drew consistent conclusions with the genetic manipulations (**Fig.2H; S2K, S2L**).

197

198 **USP10 acts as a scaffold in the destruction complex by connecting Axin1 and  $\beta$ -**  
199 **catenin**

200 We then mapped the binding site between USP10 and Axin1. Topologically, USP10  
201 contains two major parts: a conserved DUB domain at its carboxyl terminal as the rest  
202 of the protein forms one lengthy non-structured region at its amino terminal (named  
203 as  $\Delta$ DUB) (**Fig.3A**). We therefore constructed and expressed USP10 full-length (FL),  
204 CA, DUB and  $\Delta$ DUB *in vitro* and performed pull-down experiments. It was clearly  
205 seen that USP10 FL, CA and  $\Delta$ DUB interacted with Axin1 as USP10 DUB domain  
206 alone lost the binding capacity (**Fig.3B; S3A**). Since the  $\Delta$ DUB was unstructured, we  
207 arbitrarily divided it into four pieces with approximate 100 amino acids for each,  
208 named Segment 1-4 (S1-S4), respectively (**Fig.3A**). By employing the pull-down and  
209 co-IP assays, we found that S2 was mainly responsible for Axin1 binding (**Fig.3C;**  
210 **S3B**). Since Wnt/ $\beta$ -catenin signaling is highly conserved, we argued that the binding  
211 between USP10 and Axin1 should involve in their conserved residues. Through the  
212 alignment of USP10 in different species, we found seven conserved motifs within the  
213  $\Delta$ DUB (**Fig.S3C**). Through co-IP and pull-down assays, we confirmed the USP10  
214 binding site was a conserved polybasic region (PBR) in S2 region (a.a. 143-163)  
215 (**Fig.3D; S3D**).

216 We further divided Axin1 into six parts based on earlier study (**Fig.S3E**).<sup>11</sup> From co-IP  
217 and pull-down assays, we found that USP10 mainly interacted with the putative CK1  
218 binding region and DIX domain (**Fig.3E; S3F**). It was previously report that Axin1  
219 DIX domain contains a negatively-charged patch that forms self-inhibition  
220 intramolecularly.<sup>11</sup> Thus, we hypothesized that this patch was responsible for USP10  
221 PBR binding through electrostatic interaction. We observed that the binding between  
222 Axin1 and USP10 was significantly alleviated when we mutated the negatively-  
223 charged patch to neutral residues (Axin1-DA) or we truncated the USP10 PBR  
224 ( $\Delta$ PBR) (**Fig.3F**). It was further confirmed that losing either the PBR on USP10 or the  
225 negatively-charged patch on Axin1 caused loss-of-function effect of USP10 in Axin1  
226 ubiquitination and stabilization (**Fig.3G; S3G**). Taken together, USP10 directly binds  
227 to Axin1 through its conserved PBR. Axin1 is a direct substrate of USP10 for K48-  
228 linked deubiquitination which leads to the ensuing Axin1 stabilization.



229 While elucidating the deubiquitination of Axin1 by USP10, we noticed another  
230 interesting phenomenon. Despite the lack of DUB activity, expression of USP10-CA  
231 and USP10- $\Delta$ DUB consistently reduced TOPFlash reporter activity in a moderate  
232 manner instead of behaving dominant-negative (**Fig.3H**). And from the knockout and  
233 rescue experiment, the same conclusion was drawn (**Fig.3I-J**). We thus hypothesized  
234 USP10 might affected Wnt/ $\beta$ -catenin signaling besides Axin1 deubiquitination. First,  
235 we verified that neither USP10-CA nor - $\Delta$ DUB could deubiquitinate Axin1 (**Fig.S3H**).  
236 However, USP10-CA and - $\Delta$ DUB could reduce cytoplasmic  $\beta$ -catenin in a dose-  
237 dependent manner (**Fig.3K; S3I**). Together with the finding that USP10 interacted with  
238 multiple components of the  $\beta$ -catenin destruction complex, we proposed that USP10-  
239  $\Delta$ DUB may function as a scaffold that physically enhances the complex formation like  
240 Amer1/WTX.<sup>36-38</sup> When we looked into the USP10- $\beta$ -catenin interaction, we found  
241 USP10 S1 and S4 were responsible, which primarily bound to 1-5 and 9-12 Armadillo  
242 repeats on  $\beta$ -catenin (**Fig.3L; S3J-M**). Gradient transfection of  $\Delta$ DUB led to increased  
243 interaction between Axin1 and  $\beta$ -catenin dose-dependently (**Fig.3M-N**). USP10  
244 depletion, on the other hand, reduced the binding between Axin1 and  $\beta$ -catenin  
245 endogenously (**Fig.S3N**). In brief, we proposed that USP10 bound to Axin1 mainly by  
246 the conserved residues in S2 and to  $\beta$ -catenin by S1 and S4. S2 is absolutely required  
247 for both DUB-dependent and -independent activity of USP10 as it is the only region  
248 capable of Axin1 binding. S1 and S4 are responsible for  $\beta$ -catenin engagement for  
249 DUB-independent activity of USP10, which are not required for Axin1 deubiquitination.  
250 In line with our hypothesis, the minimal inhibitory units and dominant negative mutants  
251 were validated by the luciferase assays (**Fig.3O; S3O**).

252

### 253 **USP10 facilitates the puncta formation of Axin1 via a IDRs-mediated phase** 254 **separation-like manner independent of DUB activity**

255 After we dissected the contribution of USP10 in the physical interaction between Axin1  
256 and  $\beta$ -catenin, we investigated the stabilization of Axin1 granule. The formation of  
257 Axin1 granule was supposed to form via either IDR (intrinsically disordered region) -

258 mediated liquid-liquid phase separation or DIX domain-mediated oligomerization in  
259 previous literatures.<sup>10,39,40</sup> As we tested above, the interaction between the Axin1 and  
260 USP10 happened between the DIX domain and PBR of USP10 via multivalent  
261 electrostatic interactions. Briefly, the PBR of USP10 locates within a lengthy non-  
262 structured IDR, while electrically neutralized DIX domain efficiently prevented the  
263 interaction without affecting the original function of the DIX domain<sup>11</sup>; these results  
264 suggested that the stabilization of USP10 on Axin1 granule taken place mechanistically  
265 through an IDRs-mediated phase separation-like process rather than DIX domain  
266 mediated head-to-tail polymerization. Meanwhile, we want to note that the physical  
267 phase separation and polymerization/oligomerization favors each other<sup>41-43</sup>, which  
268 might augment the stabilization of Axin1 granule in the downstream. Nevertheless, our  
269 live imaging of Axin1-mCherry clearly showed their dynamic fusion and splitting of  
270 the formed droplet-like structure (**Fig.S4A**). A fluorescence recovery after  
271 photobleaching (FRAP) assay further confirmed the granules of Axin1 maintained its  
272 recovery capability (**Fig.S4B-C**).<sup>44</sup> From the assay of FRAP, we showed that the Axin1  
273 granule contained both the recoverable fraction and immobile fraction, which suggested  
274 it contained both the DIX domain-mediated polymerization and phase separation from  
275 physical interaction.

276 To study whether USP10 could regulate the granule formation of Axin1, we  
277 simultaneously expressed USP10 and Axin1 (**Fig.4A**). Co-expression with USP10 led  
278 to more Axin1 granules per cell together with larger sizes as compared to Axin1  
279 transfection alone (**Fig.4B-C**). In addition, we analyzed the immobile fraction of Axin1  
280 in the granules using FRAP assay to reflect the irreversibility in the Axin1-mCherry  
281 granules. A larger immobile fraction indicated that stabler Axin1 granules were  
282 obtained with overexpressed USP10 (**Fig.4D**). An opposite trend was obtained when  
283 we depleted the endogenous USP10 by shRNA (**Fig.4B-D**). To further confirm that it  
284 was the non-structured region-mediated phase separation assisting the granule  
285 formation of Axin1, we showed that USP10- $\Delta$ DUB still promoted the granule  
286 formation of Axin1, which confirmed that the importance of the physical interaction in

287 its function. As noted, unlike the USP10 FL, USP10- $\Delta$ DUB was not able to  
288 deubiquitinate and elevate the cellular contents of the Axin1, thus, USP10- $\Delta$ DUB  
289 elevated the granule formation of Axin1 fully on its non-structured region-mediated  
290 phase separation instead of increasing the concentration of Axin1 at the first place.  
291 More significantly, USP10- $\Delta$ DUB exhibited an even stronger promotion effect on the  
292 granule formation of Axin1 compared to the full-length USP10 as indicated by the  
293 diameter (**Fig.4C**), which might suggest the non-structured region-mediated phase  
294 separation has a more direct effect as compared to the deubiquitinating functionality.  
295 This result clearly indicated that the  $\Delta$ DUB was sufficient for the granule augmentation  
296 via IDR-mediated phase separation. Consistently, USP10-CA stabilized the granules of  
297 Axin1 as shown by their larger size (**Fig.4C**) and their increased immobile fraction  
298 under FRAP (**Fig.4D**), despite of the decreased numbers of Axin1 granule per cells  
299 formed as compared to USP10 WT (**Fig.4B**). One could argue that USP10-CA was  
300 more efficient to coalesce small Axin1 puncta into larger ones.

301 We also exercised additional assays to substantiate the findings. First, we employed  
302 immunofluorescence to observe the endogenous puncta formation of Axin1. The  
303 experiment was performed in SW480 cells, in which endogenous Axin1 formed puncta  
304 as described by the previous literature.<sup>45</sup> We knocked out the endogenous USP10 by  
305 CRISPR-Cas9 and rescued with Myc-tagged WT or mutant USP10 to the  
306 approximately equal level of the endogenous protein (**Fig.S4D-E**). The results  
307 illustrated that in the absence of USP10, Axin1 puncta number was significantly  
308 reduced (**Fig.4E-F**). Rescue by either USP10 WT, CA or  $\Delta$ DUB could recover the  
309 puncta formation of endogenous Axin1 (**Fig.4E-F**). Also, we performed *in vitro* droplet  
310 formation assay to further dissect the role of USP10 in regulating Axin1 phase  
311 separation. We expressed mCherry-tagged Axin1 and GFP-tagged USP10 (WT and  
312 mutants) in *E. coli* and purified the proteins by chromatography. It was clearly seen that  
313 Axin1 droplet size significantly enlarged after co-incubation with USP10 WT, CA or  
314  $\Delta$ DUB (**Fig.4G-H**). The fluorescent microscopy also showed strong co-existence of the  
315 red and green channels. As the negative control,  $\Delta$ DUB  $\Delta$ PBR (internal truncation of

316 PBR in  $\Delta$ DUB region) neither could coexist with Axin1 nor promote Axin1 droplet  
317 formation (**Fig.4E-H**). Together, we conclude that the USP10 stabilizes the puncta of  
318 Axin1 via phase separation independent of its DUB activity but relying on the  
319 intrinsically-disordered region.

320 Next, we tested whether the enhancement effect of USP10 on Axin1 granule via phase  
321 separation was through the multivalent physical interactions. As we mentioned above,  
322 Axin1-DA, which contains a negative-charged patch in DIX domain turning into  
323 neutral residues, exhibited a significantly suppressed binding to USP10 (**Fig.3G**). As  
324 compared to Axin1 WT, we further showed that the number, the diameter and the  
325 stability of Axin1-DA puncta were significantly lessened (**Fig.S4F-H; Fig.4I**). More  
326 importantly, combination of either USP10 WT with Axin1-DA or USP10- $\Delta$ PBR with  
327 Axin1 WT no longer promotes the formation of puncta, as no phase separation between  
328 Axin1 and USP10 can be elevated after eliminating the multivalent physical  
329 interactions (**Fig.4I**). Thus, our results suggested that USP10-Axin1 physical  
330 interactions are mainly responsible for the enhancement of granule via phase separation.  
331 Based on these finding, we argue that USP10 directly augments the Axin1-containing  
332 puncta through its IDRs-mediated phase separation, which could enhance the formation  
333 of  $\beta$ -catenin destruction complex in the downstream regardless of the DUB activity.<sup>10</sup>  
334 We proposed a mechanistic model that USP10 may repress Wnt/ $\beta$ -catenin signaling via  
335 two parallel paths. USP10 can stabilize Axin1 through its DUB activity and meanwhile  
336 physically connect the key components in the  $\beta$ -catenin destruction complex through a  
337 phase separation-like effect (**Fig.4J**). Each path individually or synergistically  
338 contributes to the repressive effect of USP10 on Wnt/ $\beta$ -catenin signaling.

339

#### 340 **USP10 functions in embryonic dorsoventral patterning and axis formation** 341 **through Wnt/ $\beta$ -catenin signaling**

342 The potential roles of USP10 in embryonic development are poorly understood.  
343 Zebrafish has emerged as a powerful model to investigate embryonic development  
344 due to its external fertilization and transparent embryos. To gain insight into the

345 functions of USP10 during zebrafish embryonic development, we firstly examined its  
346 expression by whole-mount *in situ* hybridization with an antisense probe. As shown in  
347 (**Fig.S5A**), zebrafish *usp10* transcript was ubiquitously detected in embryos from the  
348 one-cell stage up to the early somite stage. Interestingly, the expression of *usp10* was  
349 predominantly found in the developing eye field at 24 hours post-fertilization (hpf),  
350 which was remarkable decreased at 36 hpf. These results indicate that *usp10* is a  
351 maternal and zygotic gene and might have potential roles in early embryonic  
352 development. We then assessed the effects of human USP10 (hUSP10)  
353 overexpression on embryogenesis. Over 80% of the embryos injected with wild-type  
354 hUSP10 mRNA displayed ventralized phenotypes at 24 hpf, including a variably  
355 reduced head and notochord and expanded ventral tissues (**Fig.5A-B**).

356 To further confirm the role of USP10 in the embryonic dorsal-ventral patterning, the  
357 expression of dorsal markers, such as *bozozok* (*boz*) and *gooseoid* (*gsc*) were  
358 analyzed at the sphere stage by *in situ* hybridization. We found that overexpression of  
359 hUSP10 led to decreased expression of *boz* and *gsc* (**Fig.5C-D**). Meanwhile, the  
360 expansion of ventral non-neural ectoderm (indicated by *gata2* expression) further  
361 revealed the dorsal-ventral defects in hUSP10 overexpressed embryos (**Fig.5E**). On  
362 the contrary, expression of the DUB-dead mutant, USP10-CA, showed minor effect as  
363 compared to WT USP10 (**Fig.5B-E**). Inhibition of the DUB activity of endogenous  
364 USP10 in wild-type embryos by treatments with Spautin-1 obviously strengthened the  
365 expression of dorsal marker genes and repressed the expression of ventral gene *gata2*  
366 in a dose-dependent manner (**Fig.5F-H**). These results suggest that USP10 functions  
367 in embryonic dorsal-ventral patterning mainly via its DUB activity.

368 Previous studies have demonstrated that maternal Wnt/ $\beta$ -catenin signaling is essential  
369 for dorsal-ventral patterning during embryogenesis.<sup>46-48</sup> Given that our findings from  
370 cell culture systems indicated that USP10 inhibits Wnt signaling, we asked whether  
371 USP10 would affect embryonic dorsoventral axis formation through regulating  
372 Wnt/ $\beta$ -catenin pathway. To do this, hUSP10 mRNA was injected into transgenic  
373 embryos expressing GFP reporter under TCF/LEF/ $\beta$ -catenin responsive promoter

374 (TOPdGFP).<sup>49</sup> Results from *in situ* hybridization experiments revealed that hUSP10  
375 overexpression remarkably reduced the GFP reporter expression in the dorsal  
376 organizer, suggesting a defective activation of Wnt/ $\beta$ -catenin signaling (**Fig.5I**). On  
377 the other hand, blocking the DUB activities of endogenous USP10 in *Tg(TOPdGFP)*  
378 embryos by Spautin-1 treatment strongly enhanced GFP expression (**Fig.5J**).  
379 Furthermore, the reduced expression of dorsal marker genes *gsc* and *boz* in hUSP10  
380 overexpressed embryos were well restored by co-injection with  $\Delta N$ - $\beta$ -catenin mRNA  
381 (**Fig.5K-L**). These data suggested that USP10 has a profound impact on maternal  
382 Wnt/ $\beta$ -catenin signaling during early embryonic development. In addition, consistent  
383 with the data *in vitro*, immunoblotting results showed an obvious increase of  
384 endogenous zebrafish Axin1 protein level in embryos with hUSP10 overexpression  
385 (**Fig.S5B-C**). In contrast, inhibition of the deubiquitinate activity of USP10 resulted in  
386 a significant decrease of Axin1 (**Fig.S5D-E**). Altogether, these results indicate that  
387 USP10 has a conserved role in regulating Axin1 stability depending on its DUB  
388 activity, which is responsible for proper dorsoventral axis patterning during embryo  
389 development.

390

### 391 **USP10 critically regulates intestinal organoid homeostasis**

392 Intestinal organoid (mini-gut) culturing emerges as an essential tool to study intestinal  
393 homeostasis *ex vivo*.<sup>50-52</sup> It is a three-dimensional structure that consists intestinal-  
394 specific cell types and cell lineage and can recapitulate the growth and differentiation  
395 of intestinal epithelium. The sphere-like organoid represents the clustering of Lgr5<sup>+</sup>  
396 intestinal stem cells and the budded organoid represents the well-differentiated  
397 epithelial mini-structure. It is well established that intestinal organoid growth and  
398 differentiation are highly dependent on Wnt/ $\beta$ -catenin signaling amplitude.<sup>50,52</sup> In  
399 intestinal “stem cell” state culture (sphere-like), we initially found that the organoid  
400 could not survive from the overexpression of USP10, which prevented us from  
401 statistical analysis. We therefore employed the “Tet-off” system to study the effect.  
402 When doxycycline was removed from the medium, we found that ectopic expression

403 of USP10 led to the straight intestinal stem cell death similar to the effect of Axin1,  
404 and this phenotype could be rescued by the addition of GSK3 inhibitor (**Fig.6A-B**).  
405 Under such circumstance, overexpression of USP10-CA only showed partial effect in  
406 resulting cell death (**Fig.6A-B**). When USP10 was depleted in differentiated intestinal  
407 organoid culture (budded), the organoid architecture changed as the number of  
408 sphere-like bodies was markedly increased (**Fig.6C-D; S6A-B**). This change of  
409 stemness was further evidenced by the increase of proliferation marker Ki67 and  
410 reduction of differentiation marker Krt20 (**Fig.6C**). And this effect could be  
411 effectively reversed by the addition of TNKS inhibitor XAV939, which accumulates  
412 Axin1 to counteract USP10-loss (**Fig.6C-D**). While we used Spautin-1 to inhibit  
413 USP10 DUB activity in intestinal organoid culture, we noticed a significant increase  
414 in the number of sphere-like bodies which represented the increase of self-renewal  
415 potential (**Fig.6E-F; S6C-D**). However, the diameters of Spautin-1 treated spheres  
416 were significantly smaller than those of GSK3 inhibitor, which indicated their  
417 difference in potentiating stem cell growth and suggested the scaffolding and phase-  
418 transitional function of USP10 could have potential influence in this situation  
419 (**Fig.6G; S6E-I**). Together, these results indicate that USP10 modulates intestinal  
420 organoid growth and differentiation *ex vivo* through Wnt/ $\beta$ -catenin signaling. Both the  
421 DUB activity and biophysical property of USP10 contribute to the intestinal organoid  
422 homeostasis. USP10 inhibitor such as Spautin-1 possesses therapeutic potential in  
423 regeneration for Wnt/ $\beta$ -catenin stimulation.

424

#### 425 **USP10 suppresses CRC growth through inhibition of Wnt/ $\beta$ -catenin signaling**

426 Wnt/ $\beta$ -catenin dysregulation, in particular APC-truncation is the predominant cause for  
427 human CRC.<sup>53</sup> We thus assessed the role of USP10 in CRC. We first verified that in  
428 APC-truncated CRC cell lines, ectopic expression of USP10 effectively increased  
429 endogenous Axin1 level and reduced cytosolic  $\beta$ -catenin amount, as depletion of  
430 USP10 behaved oppositely (**Fig.7A-C; S7A**). Functionally, we found that ectopic  
431 expression of USP10 significantly inhibited CRC cell growth both two- and three-

432 dimensionally, as well as cancer cell migration, whereas USP10 depletion (both  
433 knockout and knockdown) or overexpression of the dominant-negative USP10 mutants  
434 accelerated cancer growth instead (**Fig.7D-G; S7B-F**). Notably, expression of the  
435 DUB-dead mutant, USP10-CA, was capable to effectively mitigate the cancer growth  
436 comparable to the effect of USP10 WT (**Fig.7D, 7F-G**). Molecularly, USP10-CA  
437 reduced the cytosolic  $\beta$ -catenin level and Wnt-target genes (Wnt feedback: AXIN2 and  
438 LGR5; cell proliferation: MYC and CCND1) to the same extent of USP10 WT (**Fig.**  
439 **7H-I**). This data demonstrates the enhancement effect of USP10 on physical phase  
440 separation but not USP10 DUB activity is mainly required to withhold CRC growth.  
441 Considering that either loss of Axin1 or APC can cause the release of  $\beta$ -catenin<sup>1</sup>, we  
442 reason that in APC-truncated CRC the compensation of APC scaffolding function by  
443 USP10 is predominantly required, whereas the stabilization of Axin1 plays a lesser role  
444 (**Fig.7J**). And we also logically argue that the USP10-mediated anti-tumor effect in  
445 CRC may largely depend on its inhibition on Wnt/ $\beta$ -catenin instead of other pathways,  
446 given the fact that all other tumor-suppressing USP10 functions known previously rely  
447 on its DUB activity.<sup>21,54</sup>

448 We next transplanted these cells subcutaneously onto nude mice for *in vivo* study. For  
449 the transplanted DLD-1 cells, the size and weight of the derived tumors were  
450 significantly increased when USP10 was depleted (**Fig.7K-L; S7G**). In contrast, either  
451 USP10 WT or USP10-CA overexpression caused significant diminish of the *in vivo*  
452 tumor growth, which was consistent with the *in vitro* results (**Fig.7K-L; S7G**). The  
453 immunohistochemistry (IHC) showed stronger staining for Ki67 and  $\beta$ -catenin in  
454 shUSP10 group than the control group (**Fig.7M**). And the intensities of these staining  
455 were attenuated when either USP10 WT or USP10-CA was ectopically expressed (**Fig.**  
456 **7M**).

457 To further consolidate the role of USP10 in CRC, we looked into the clinical database  
458 and acquired the human tumor specimens. From TCGA database, we found that  
459 USP10 expression showed significant positive correlation with longer overall survival  
460 in CRC patients (**Fig.S7H**). This correlation in prognosis was also supported by



461 another research which studied a Korean CRC cohort.<sup>55</sup> To determine the  
462 consequence of differential expression of USP10 in human CRC, 92 primary CRC  
463 tissues on a microarray were examined by IHC. Representative images were shown in  
464 **Fig.7N**. The grouped analysis based on USP10 intensity showed clear difference in  
465 Axin1 and nuclear  $\beta$ -catenin ratio in the CRC samples (**Fig.S7I-J**). Overall, higher  
466 USP10 level significantly correlated with higher Axin1 level and lower nuclear-  
467 localized  $\beta$ -catenin ratio, which was fully supportive to our molecular and cell  
468 biological studies (**Fig.7N-P**). Collectively, our data has shown that USP10  
469 suppresses CRC growth by inhibiting Wnt/ $\beta$ -catenin both *in vitro* and *in vivo*, and the  
470 DUB-independent scaffolding function plays the major role in APC-truncated CRC  
471 growth blockade. Clinically, USP10 level significantly correlates with CRC patient  
472 survival, Axin1 levels and nuclear  $\beta$ -catenin ratio.

473

## 474 **Discussion**

475 Wnt/ $\beta$ -catenin signaling is an essential pathway that is being actively studied for  
476 decades.<sup>1,2</sup> For the first time, we identified USP10 as a critical regulator of this  
477 pathway and proved that USP10 participates in various Wnt-governed biological  
478 processes. In embryonic development and intestinal homeostasis, perturbation of  
479 USP10 showed strong Wnt-related phenotypes. And in CRC, USP10 behaves as a  
480 strong tumor suppressor both *in vitro* and *in vivo* and shows correlation in the clinical  
481 investigations.

482 As a “star molecule” that was reported to regulate multiple important proteins<sup>21</sup>, the  
483 biological significance and multipurpose nature of USP10 are further revealed in this  
484 work. However, different from the previous researches, we have discovered a novel  
485 mechanism that USP10 regulates Wnt/ $\beta$ -catenin signaling by both classical (DUB  
486 activity) and alternative (scaffolding and phase transition) paths. USP10 directly binds  
487 to Axin1 through each other’s conserved motifs, which enables the clearance of K48-  
488 linked ubiquitination on Axin1 to lengthen the protein lifetime. This binding, on the  
489 other hand, occupies the Axin1 intramolecular inhibition site on the DIX domain and

490 potentially allows the “open-state” of Axin1 to further extend for  $\beta$ -catenin  
491 entrapment.<sup>11</sup> Also, the intrinsically-disordered region of USP10 bridges both Axin1  
492 and  $\beta$ -catenin, therefore offers USP10 a scaffold position in the dynamic formation of  
493 the destruction complex. As a result, USP10 is crucially for the physical interaction in  
494 phase separation-like process and the recruitments of  $\beta$ -catenin. This novel “dual-  
495 wielding” mechanism sheds new light on the versatility of USP10 functions and  
496 provides new directions for researchers who are interested in DUB studies.

497 The dual Wnt-regulatory mechanisms of USP10 both rely on Axin1, but can act  
498 parallelly to modulate the magnitude of Wnt signaling. We also observed that in  
499 different biological processes, the functional significance of each “weapon” was  
500 highly context-dependent. For instance, in embryonic development, dorsal-ventral  
501 axis formation and patterning primarily require the DUB activity. Both the enzymatic  
502 and scaffolding capabilities are involved in intestinal homeostasis, whereas in human  
503 CRC the scaffolding capability of USP10 is more predominant. One reason could be  
504 that in diverse contexts, the sensitivity of Axin1 stabilization and destruction complex  
505 formation are different. This might result in the redundancy of one path and the dearth  
506 of the other. Therefore, the dominance of particular activity or the coordination of  
507 both in various biological situations requires further scrutiny. Once these processes  
508 are fully understood, one could envision that USP10 inhibitor such as Spautin-1, may  
509 have therapeutic potentials in particular tissue maintenance, organ regeneration or  
510 degenerative disease treatment. And small molecules blocking USP10 PBR binding  
511 with Axin1 might have even broader potential applications in Wnt-defective disease  
512 therapy.

513 Many aspects can affect the malignant tumor progression. In our study, USP10  
514 downregulates Wnt/ $\beta$ -catenin signaling to reduce cell stemness and decelerate cell  
515 cycle.<sup>1</sup> Alternatively, USP10 was also reported to inhibits cancer growth by  
516 deubiquitinating tumor suppressors including PTEN, AMPK and TP53.<sup>23,24,26-28,54</sup> So  
517 presumably USP10 may affect CRC growth through these proteins. However, the  
518 DUB-dead mutant, USP10-CA, which could not deubiquitinate any substrate rather

519 than elevate  $\beta$ -catenin degradation via physical phase separation, showed  
520 indistinguishable effect to WT USP10 in Wnt/ $\beta$ -catenin suppression and CRC growth  
521 inhibition.

### 522 **Significance**

523 To conclude, we have found that USP10 substantially thwarts Wnt/ $\beta$ -catenin signaling  
524 in various biological conditions through a novel “dual-regulation” mechanism. This  
525 study further discovers a crucial Wnt regulator and offers conceptual breakthrough of  
526 DUB enzyme-independent functioning, thus holding great value in basic biomedical  
527 research as well as potential for translation.

### 528 **Limitations**

529 There are still certain issues for us to dissect in the near future. First, the functions of  
530 USP10 in different organ development and homeostasis are not fully studied in this  
531 work. Thus, USP10 (conditional) knockout and transgenic animals should be  
532 generated to obtain more tissue-specific and physiological results. Second, the  
533 relationship between USP10 DUB-dependent and -independent mechanisms in  
534 different biological processes needs further scrutiny. It is necessary to better  
535 understand the factors in each biological context and then correlate USP10  
536 functionality of individual path.

537

### 538 **Acknowledgement**

539 The authors thank Dr. Chen Ding (Northeastern University) for scientific advice; Dr.  
540 Aina He (Shanghai Sixth People’s Hospital) and Dr. Long Zhang (Zhejiang  
541 University) for plasmids sharing. R.S. acknowledges the support by the Fundamental  
542 Research Fund for the Central Universities, China N182005006 (completed), National  
543 Natural Science Foundation of China 31970721 and 81902830, and Liaoning  
544 Provincial Talents Project XLYC1807239 (completed). Y.L. acknowledges the  
545 National Natural Science Foundation of China 32171248 and 12102142, and the  
546 Fundamental Research Funds for the Central Universities, HUST grant  
547 2021GCRC056. Q.W. acknowledges the support of National Natural Science

548 Foundation of China 32025014 and 81921006. L.C. acknowledges the support by the  
549 key project of the National Natural Science Foundation of China 82030091.

550

#### 551 **Author contributions**

552 R.S. designed the study. Y.W., A.M., J.L., P.L., S.Z., T.T., Z.L., H.Z., L.M., J.L., Q.H.,  
553 F.Q. Y.L. and R.S. performed experiments and collected and analyzed the data. X.Z  
554 (Xinjun Zhang), M.C., X.H., X.Z (Xi Zhang), T.F., B.L., L.C., Q.W., Y.L., D.G. and  
555 R.S. wrote and revised the manuscript. L.C., Q.W., Y.L. and R.S. oversaw the study.  
556 All authors have approved the manuscript.

557

#### 558 **Declarations of interest**

559 The authors declare no conflict of interest.

560

#### 561 **Figures and legends**

562

Figure 1

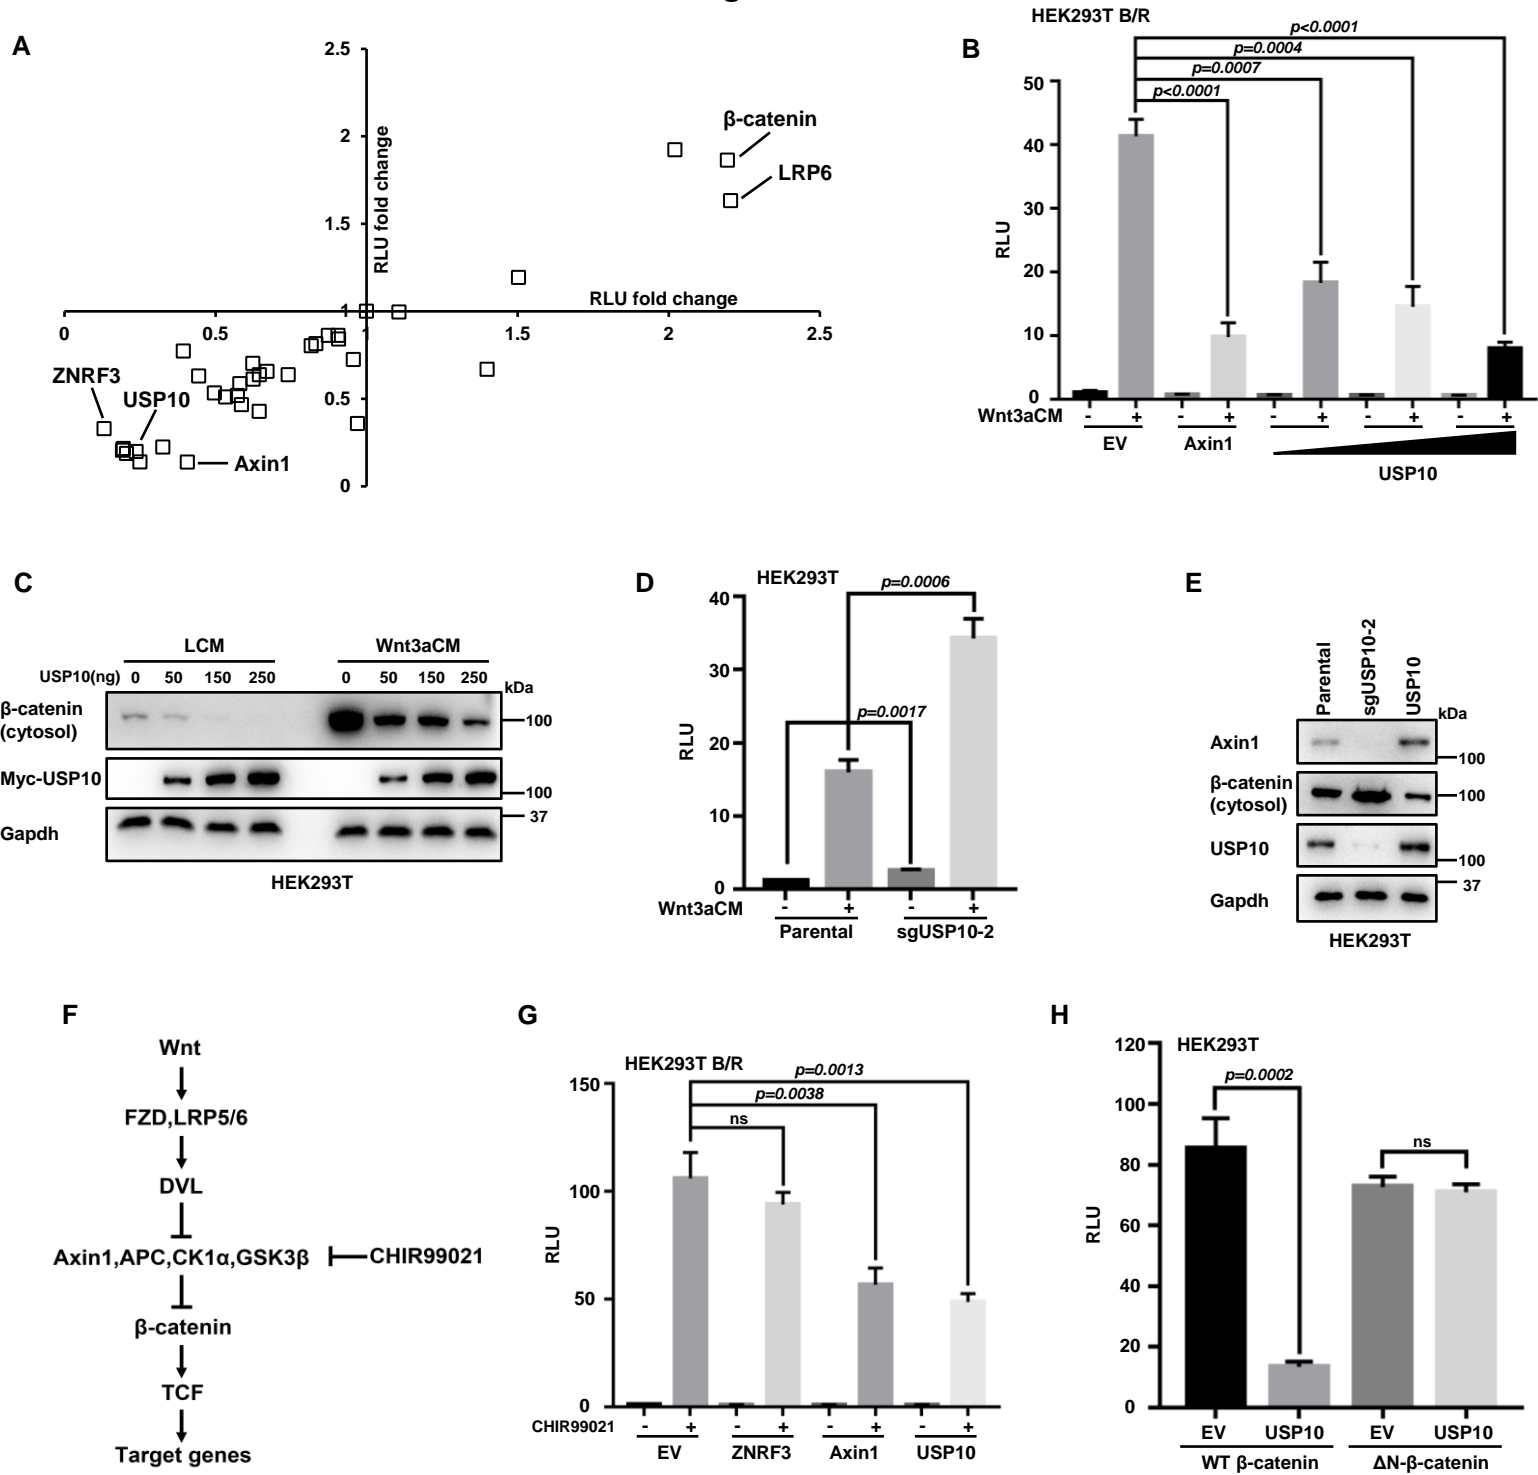

563 **Figure 1. USP10 is a negative regulator of Wnt/ $\beta$ -catenin signaling.**  
564 (A) DUB cDNA screening on Wnt/ $\beta$ -catenin signaling by TOPFlash reporter fold  
565 changes in HEK293T cell. The two axes represent two independent sets of  
566 experiments. LRP6 and  $\beta$ -catenin are positive controls, while ZNRF3 and Axin1 are  
567 negative controls.  
568 (B) USP10 significantly reduces TOPFlash activity fold change dose-dependently at  
569 the presence of Wnt3a CM. Error bars mean  $\pm$  SD, n = 3, two-tailed Student's t-test.  
570 (C) USP10 reduces cytosolic  $\beta$ -catenin accumulation dose-dependently shown by WB  
571 assay.  
572 (D) Knockout of USP10 significantly enhances TOPFlash reporter at the presence of  
573 Wnt3a CM. Error bars mean  $\pm$  SD, n = 3, two-tailed Student's t-test.  
574 (E) WB assay showing the alteration of cytosolic  $\beta$ -catenin levels under USP10  
575 overexpression or knockout condition.  
576 (F) Schematic flow of Wnt/ $\beta$ -catenin signal transduction process.  
577 (G) TOPFlash reporter assay under the treatment of GSK3 inhibitor CHIR99021.  
578 ZNRF3: Wnt signalosome control. Axin1:  $\beta$ -catenin destruction complex control.  
579 Error bars mean  $\pm$  SD, n = 3, two-tailed Student's t-test.  
580 (H) TOPFlash reporter assay under the expression of wild-type and  $\Delta$ N- $\beta$ -catenin.  
581 Error bars mean  $\pm$  SD, n = 3, two-tailed Student's t-test.  
582 RLU: Relative Luciferase Unit. ns, not significant.  
583

**Figure 2**

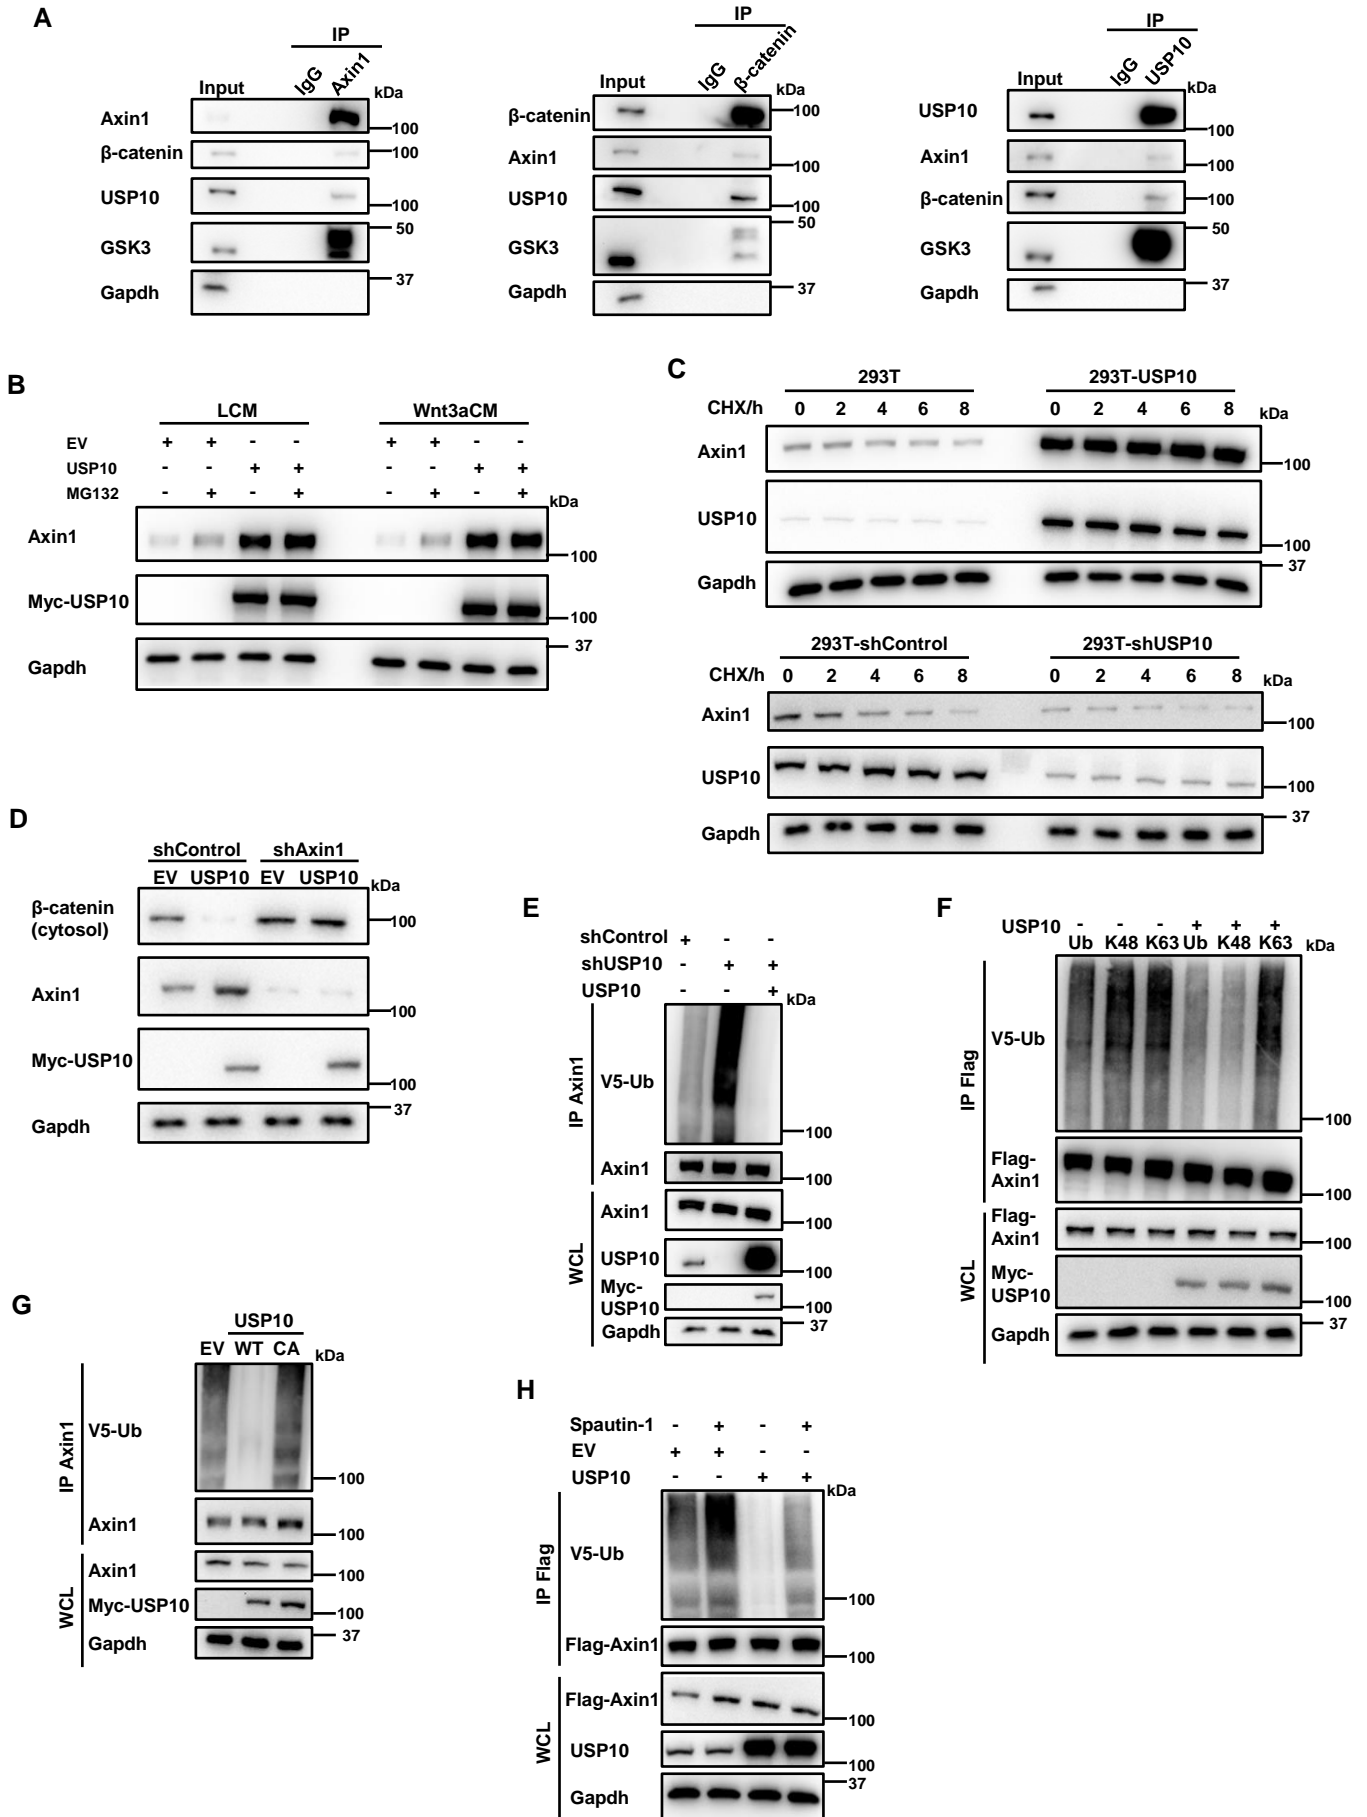

584 **Figure 2. USP10 stabilizes Axin1 through K48-linked deubiquitination.**

585 (A) Co-IP assay showing USP10 interaction with Axin1,  $\beta$ -catenin and GSK3  
586 endogenously.

587 (B) Axin1 protein level changes under the expression of USP10 or/and the treatment  
588 of proteasome inhibitor MG132.

589 (C) Pulse-chase assay of endogenous Axin1 under USP10 overexpression (upper) or  
590 depletion (lower) conditions.

591 (D) Axin1 and cytosolic  $\beta$ -catenin levels under Axin1 knockdown or/and USP10  
592 overexpression condition.

593 (E) Ubiquitination assay of Axin1 under USP10 knockdown and rescue conditions.

594 (F) Ubiquitination assay showing USP10 mainly affects Axin1 K48-ubiquitination.

595 (G) Ubiquitination assay showing USP10-CA mutant loses the capability to  
596 deubiquitinate endogenous Axin1.

597 (H) Ubiquitination assay showing USP10 inhibitor Spautin-1 effectively thwarts  
598 USP10 DUB activity and increases Axin1 ubiquitination level.

599



**Figure 3**

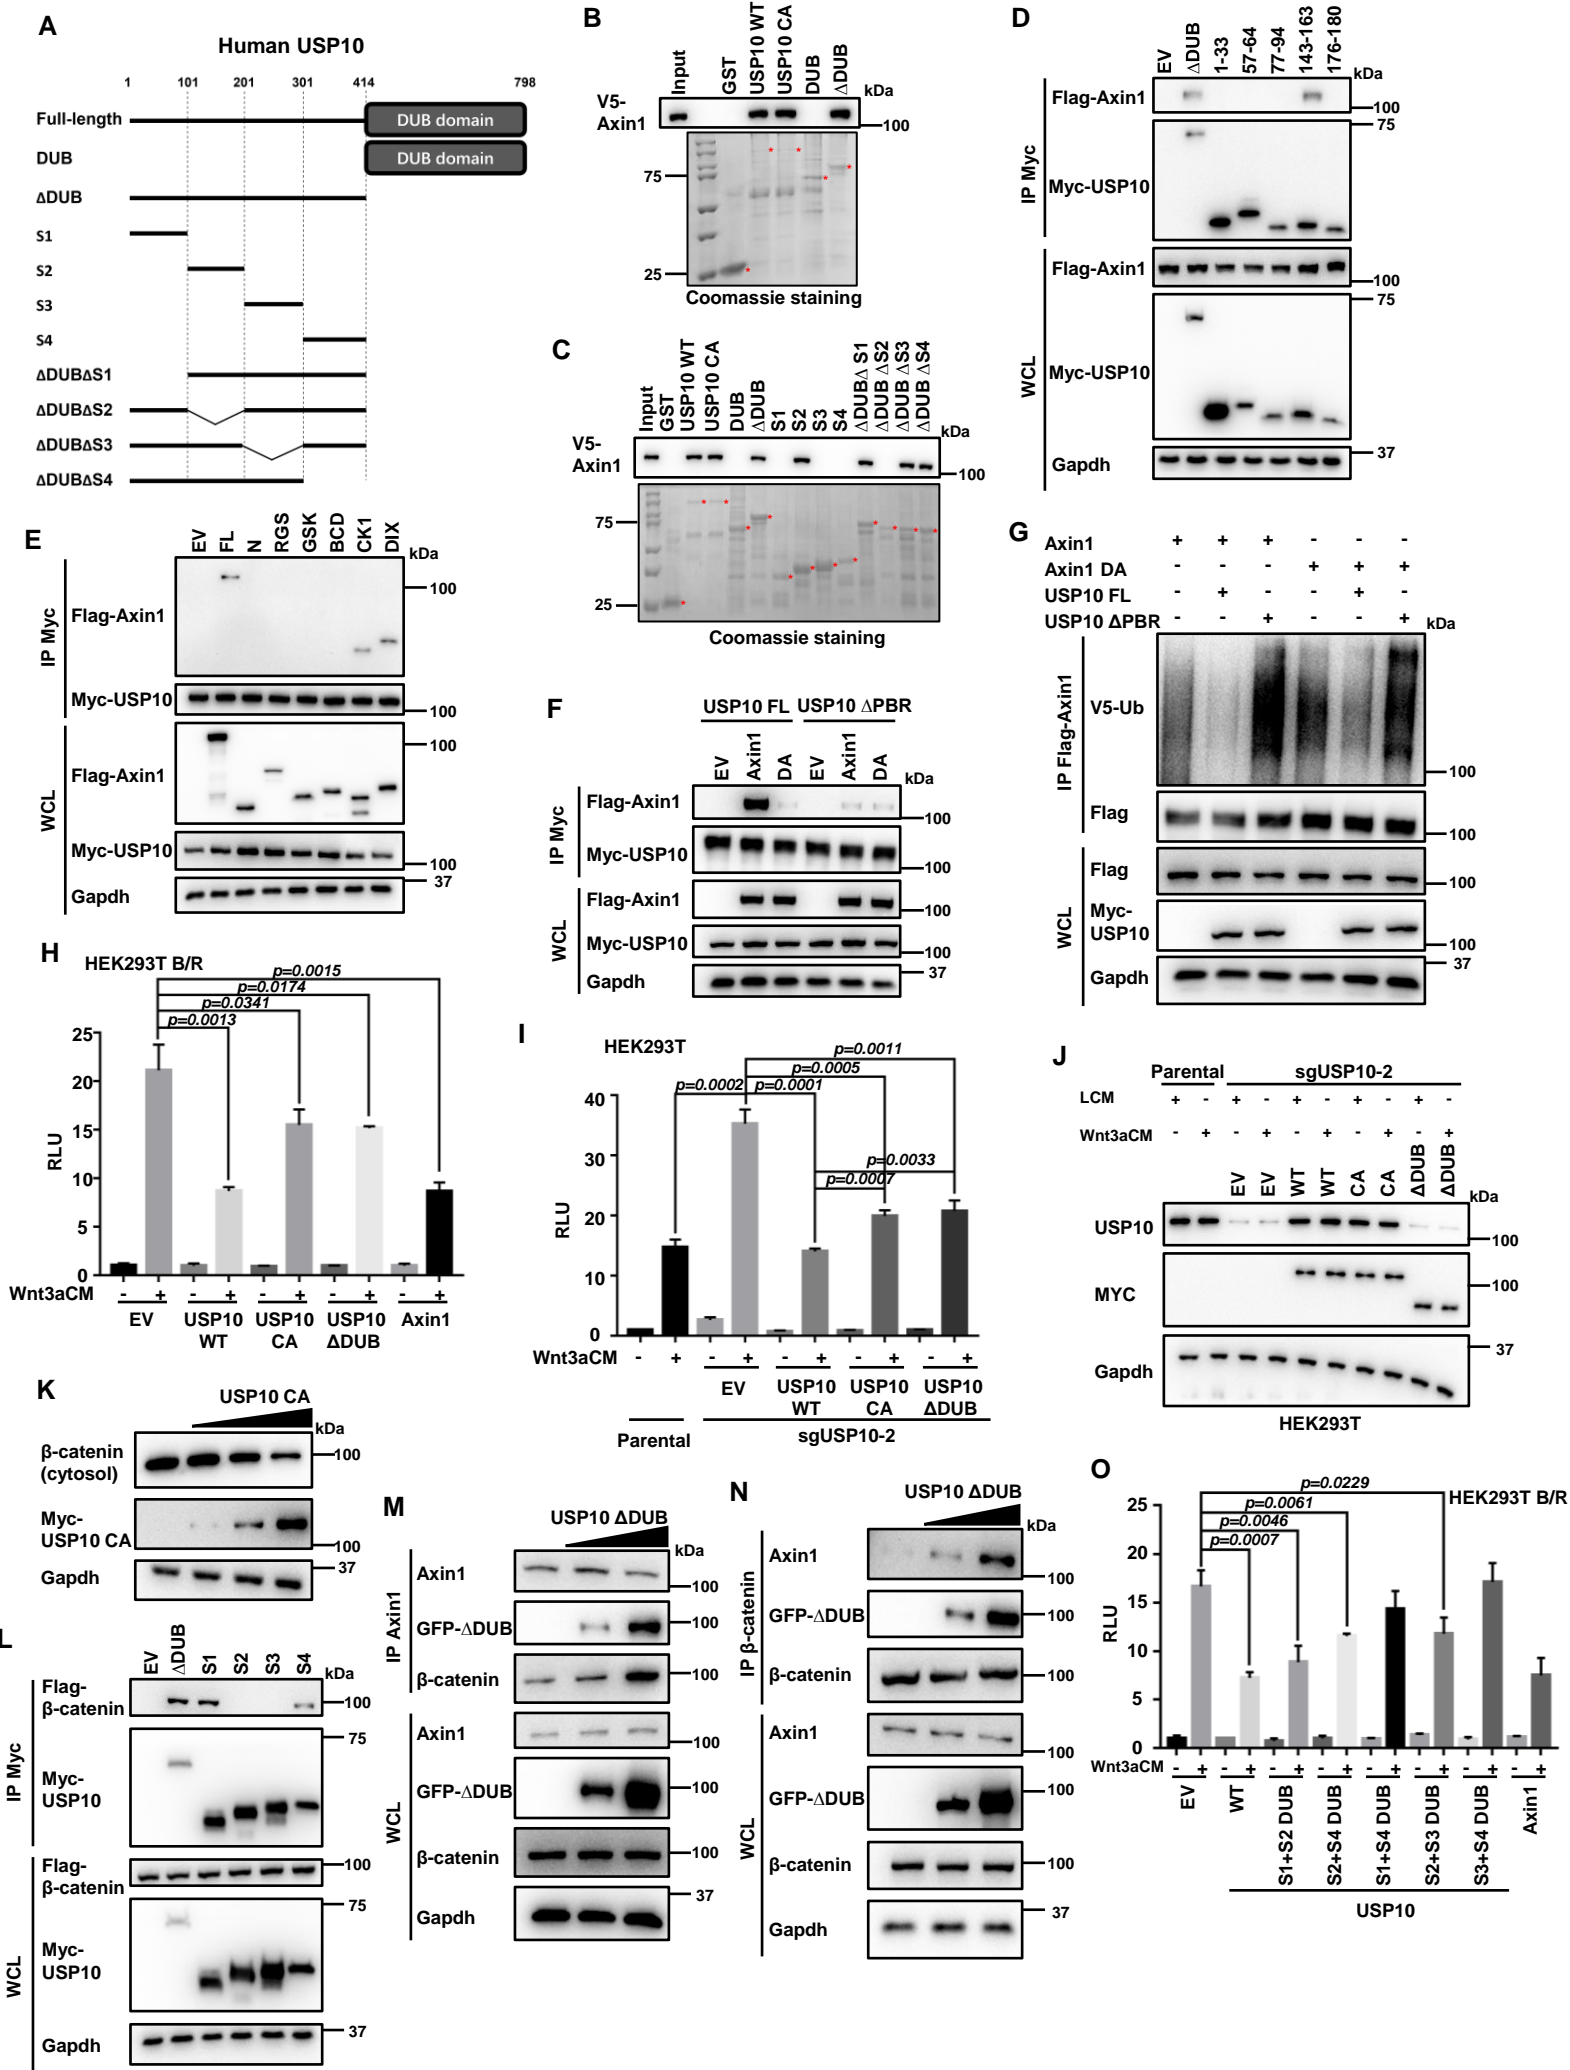

600 **Figure 3. USP10 acts as a scaffold in the destruction complex by connecting**  
601 **Axin1 and  $\beta$ -catenin**  
602 (A) Schematic diagram of USP10 truncation mutants constructed in this work.  
603 (B, C) *In vitro* pull-down assay of different GST-USP10 fragments with Axin1.  
604 Asterisks represent the major bands of the desired proteins.  
605 (D) Co-IP assay of Axin1 with different conserved regions of USP10.  
606 (E) Co-IP assay of USP10 with different segments of Axin1.  
607 (F) Co-IP assay of USP10 WT/ $\Delta$ PBR with Axin1 WT/DA.  
608 (G) Ubiquitination assay showing USP10- $\Delta$ PBR cannot deubiquitinate Axin1. And  
609 Axin1-DA cannot be deubiquitinated by USP10.  
610 (H, I) TOPFlash reporter assay showing USP10-CA and USP10- $\Delta$ DUB retain  
611 moderate inhibitory effect on Wnt/ $\beta$ -catenin by overexpression (H) or USP10  
612 knockout and rescue (I). Error bars mean  $\pm$  SD, n = 3, two-tailed Student's t-test.  
613 (J) USP10 protein level test by WB in (I). The endogenous USP10 antibody cannot  
614 identify  $\Delta$ DUB region and thus immunoblotting on Myc serves as a ruler for protein  
615 level.  
616 (K) WB showing cytosolic  $\beta$ -catenin level diminishes dose-dependently of USP10-  
617 CA.  
618 (L) Co-IP assay showing different segments of USP10 interacting with  $\beta$ -catenin.  
619 (M, N) Co-IP assay showing the interaction strength of endogenous Axin1 and  $\beta$ -  
620 catenin enhances while the dose of USP10- $\Delta$ DUB increases.  
621 (O) TOPFlash reporter assay showing the minimal functional truncations of USP10  
622 require S2 region with the DUB domain. Error bars mean  $\pm$  SD, n = 3, two-tailed  
623 Student's t-test.  
624

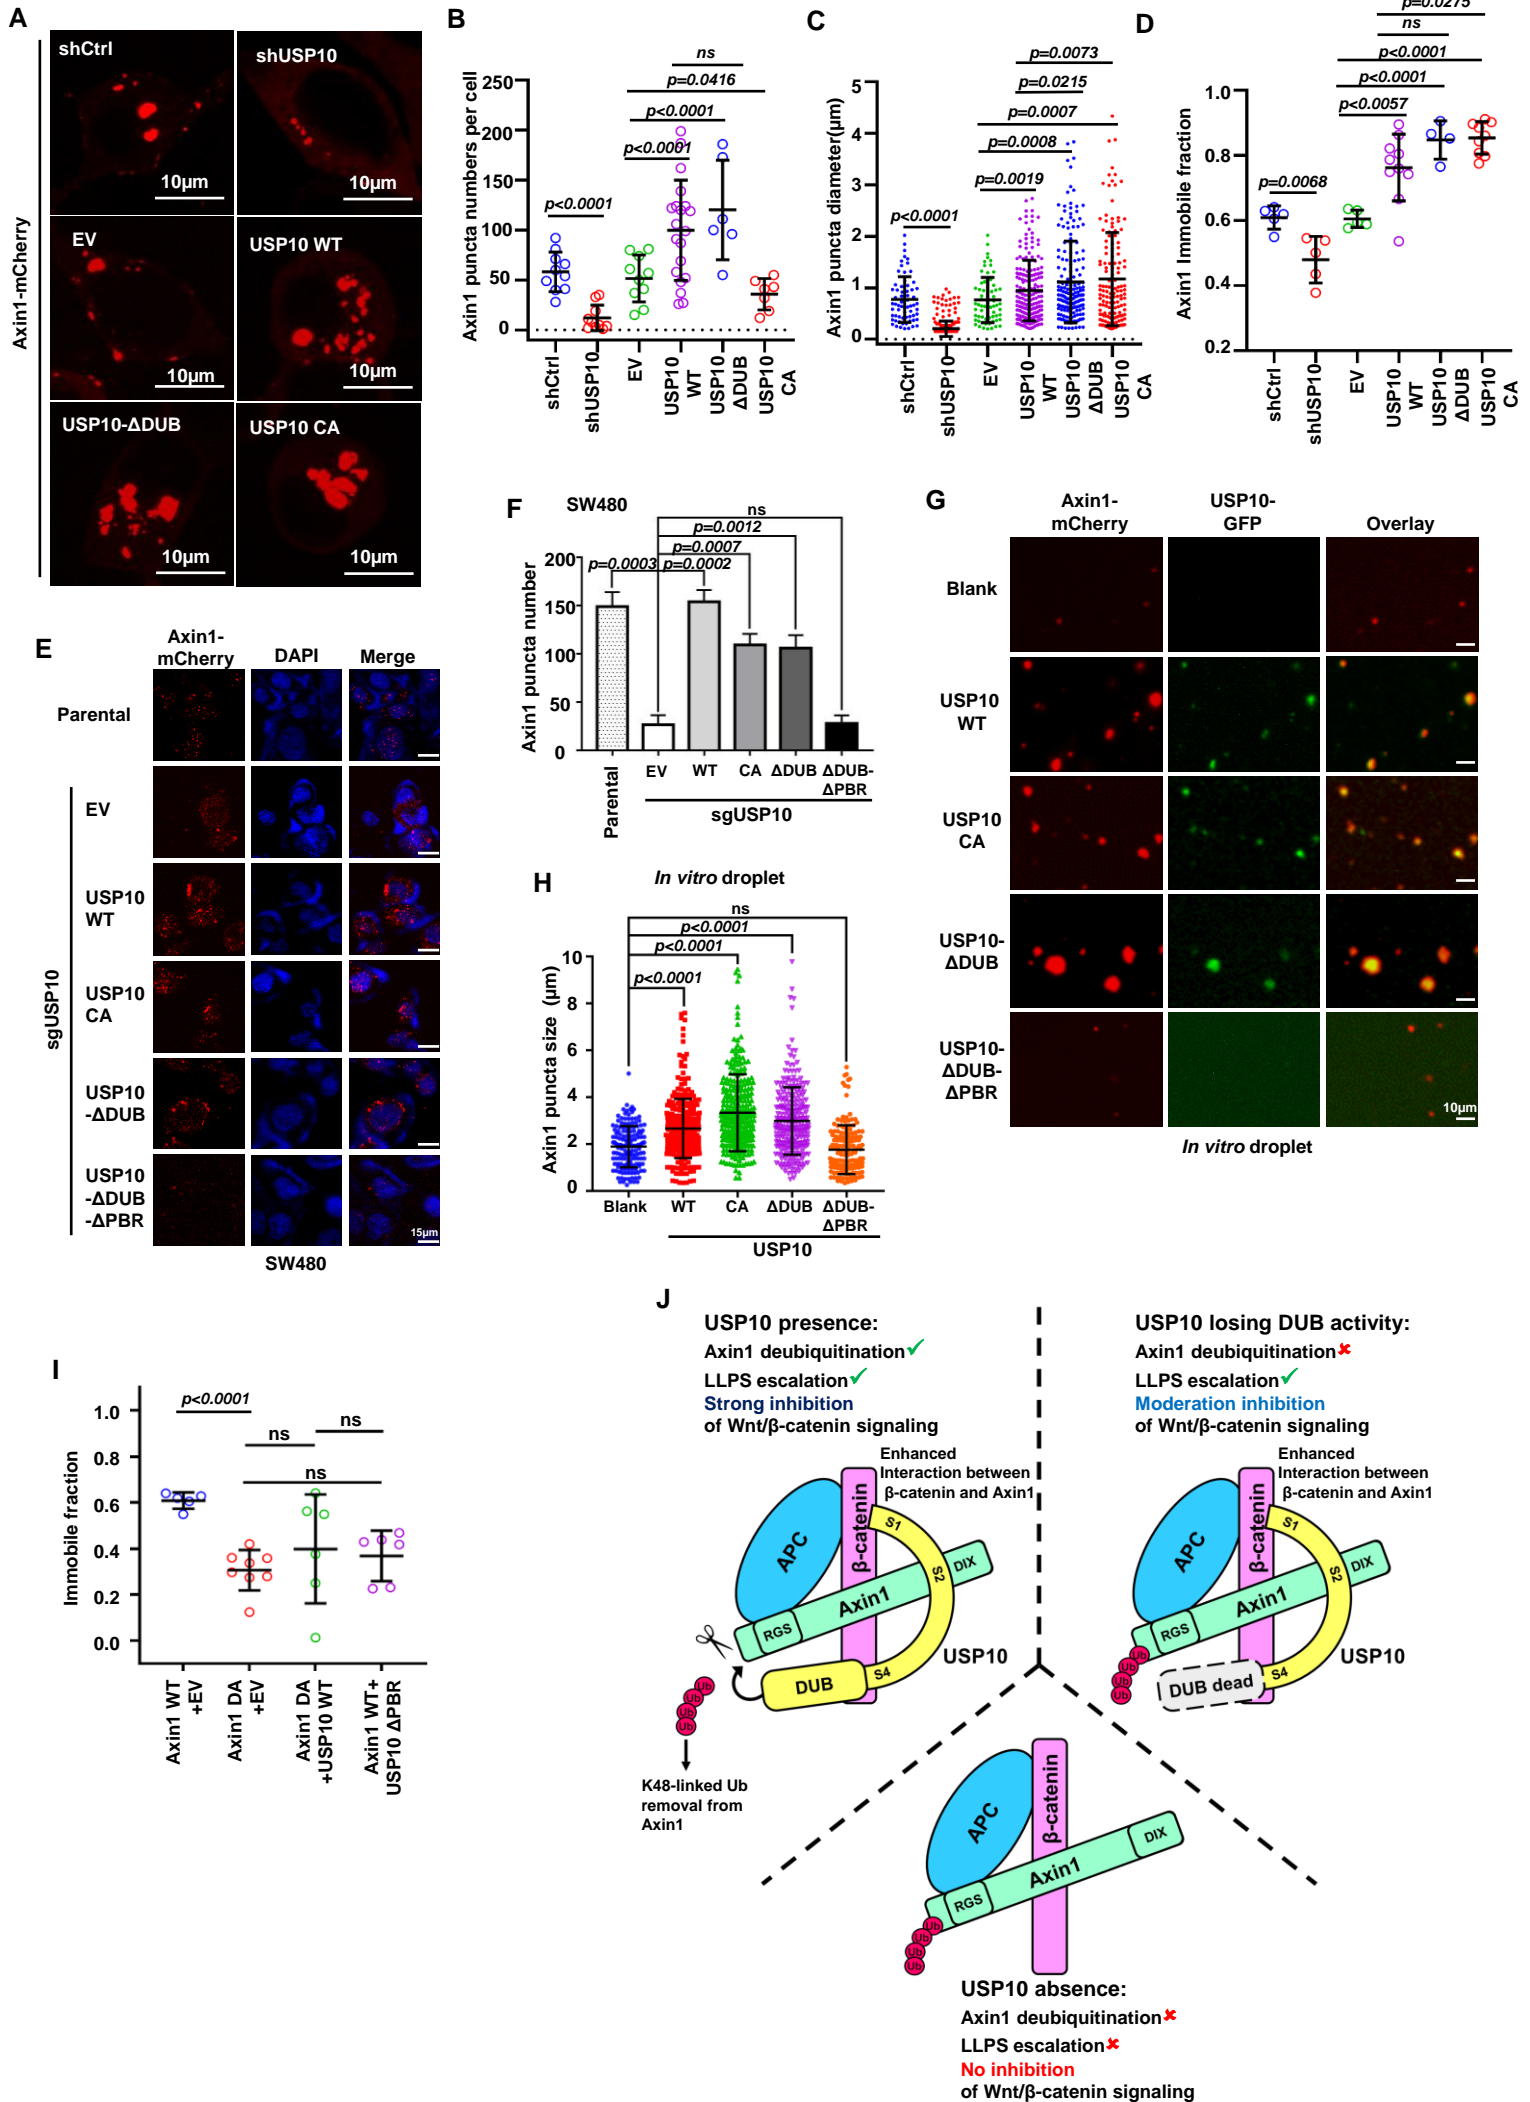

625 **Figure 4. USP10 facilitates the puncta formation of Axin1 via a IDRs-mediated**  
626 **phase separation-like manner independent of DUB activity**

627 (A) Representative fluorescent images of Axin1 droplets when co-expressed with  
628 shCtrl, shUSP10, EV, USP10 WT, USP10 CA and USP10- $\Delta$ DUB.

629 (B-D) Numbers of Axin1 puncta per cell (B), size of Axin1 puncta (C), and immobile  
630 fraction (D) of Axin1 puncta. Error bars mean  $\pm$  SD, two-tailed Student's t-test.

631 (E) Representative figures of Axin1 puncta by immunostaining of endogenous Axin1  
632 in SW480 cell. Red, Axin1 (Alexa 555). Blue, DAPI. All figures are in the same scale  
633 in this panel.

634 (F) The statistical analysis of (E). Error bars mean  $\pm$  SD, by two-tailed Student's t-  
635 test.

636 (G) Representative figures of *in vitro* phase separation assay by co-incubation of  
637 bacterial expressed Axin1-mCherry and USP10-GFP (WT and mutants). Red, Axin1-  
638 mCherry. Green, USP10-GFP. USP10  $\Delta$ DUB  $\Delta$ PBR does not colocalize with Axin1  
639 and thus appears as widespread background in green channel. All figures are in the  
640 same scale in this panel.

641 (H) The statistical analysis of (G). Error bars mean  $\pm$  SD, by two-tailed Student's t-  
642 test.

643 (I) Immobile fraction of Axin1-DA puncta when co-expressed with USP10 WT and  
644 USP10- $\Delta$ PBR, as compared to Axin1 WT puncta.

645 (J) Working model of USP10 inhibiting Wnt/ $\beta$ -catenin signaling. The DUB activity  
646 contributes to deubiquitination and stabilization of Axin1, and the unstructured region  
647 promotes LLPS of the destruction complex through physical interactions.

648 RLU: Relative Luciferase Unit. ns, not significant.

649

**Figure 5**

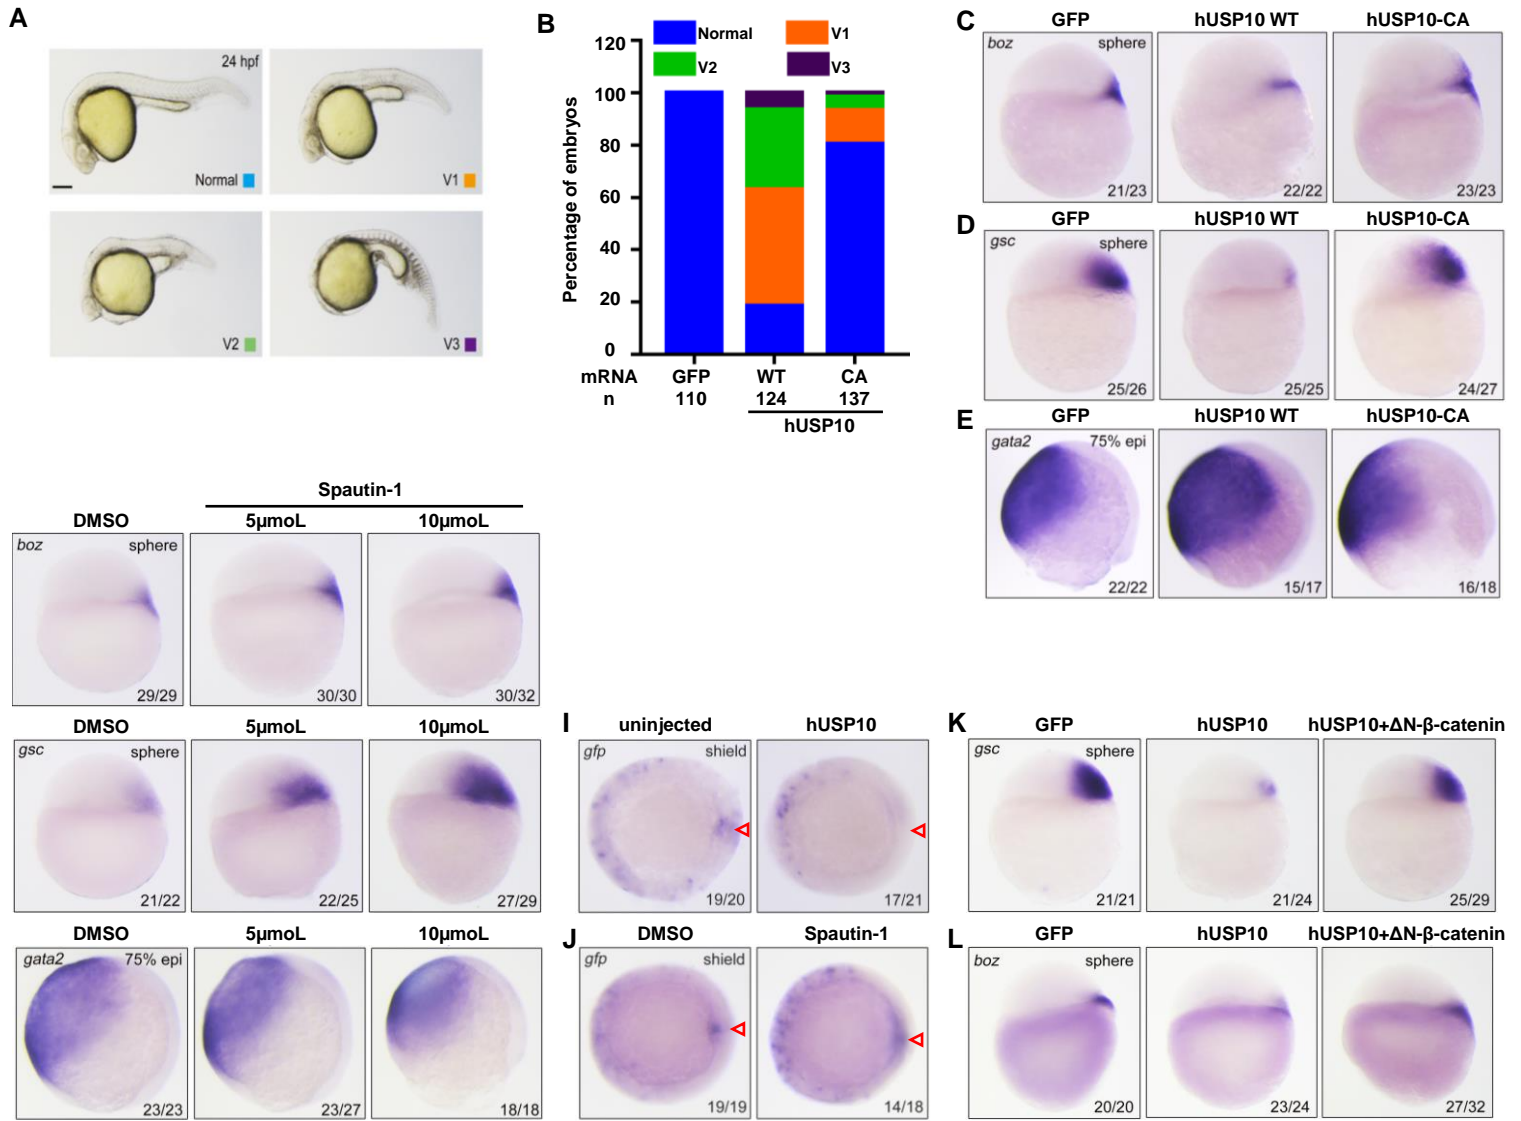

650 **Figure 5. USP10 functions in embryonic dorsoventral patterning and axis**  
651 **formation through Wnt/ $\beta$ -catenin signaling**  
652 (A, B) Embryos were injected with 500pg hUSP10 or hUSP10-CA mRNA at the one-  
653 cell stage. Representative embryos of different classes at 24 hpf were shown in (A),  
654 lateral views with anterior to the left. The percentage of embryos with indicated  
655 phenotype were shown in (B). Scale bar, 200 $\mu$ m.  
656 (C-E) The expression analysis of dorsal marker genes (C, *boz* and D, *gsc*) at the  
657 sphere stage and ventral marker gene (E, *gata2*) in embryos injected with indicated  
658 mRNA at the 75% epi (epiboly) stage. Lateral views. Embryos were injected with  
659 500pg hUSP10 or hUSP10-CA mRNA at one-cell stage, 500pg GFP injection was  
660 used as a control.  
661 (F-H) Dorsal marker genes (F, *boz* and G, *gsc*) and ventral marker gene (H, *gata2*)  
662 were assessed in DMSO and Spautin-1 (5 $\mu$ mL or 10 $\mu$ mL) incubated embryos at  
663 indicated stage by *in situ* hybridization. Lateral views.  
664 (I, J) Whole-mount *in situ* hybridization analyzed the transcript of *gfp* in hUSP10-  
665 injected (I) or Spautin-1 (J) treated *Tg(TOPdGFP)* embryos at shield stage. Animal  
666 views with dorsal side to the right. Red arrows point to the dorsal organizer of the  
667 embryo.  
668 (K, L) Overexpression of  $\Delta N$ - $\beta$ -catenin mRNA rescued hUSP10-induced  
669 ventralization. Embryos were injected with 500pg of hUSP10 mRNA alone or  
670 together with 100pg of  $\Delta N$ - $\beta$ -catenin mRNA at the one-cell stage and harvested at the  
671 sphere stage for *in situ* hybridization with the probe of *gsc* (K) and *boz* (L).  
672 The number of the embryos was indicated within each panel.  
673

**Figure 6**

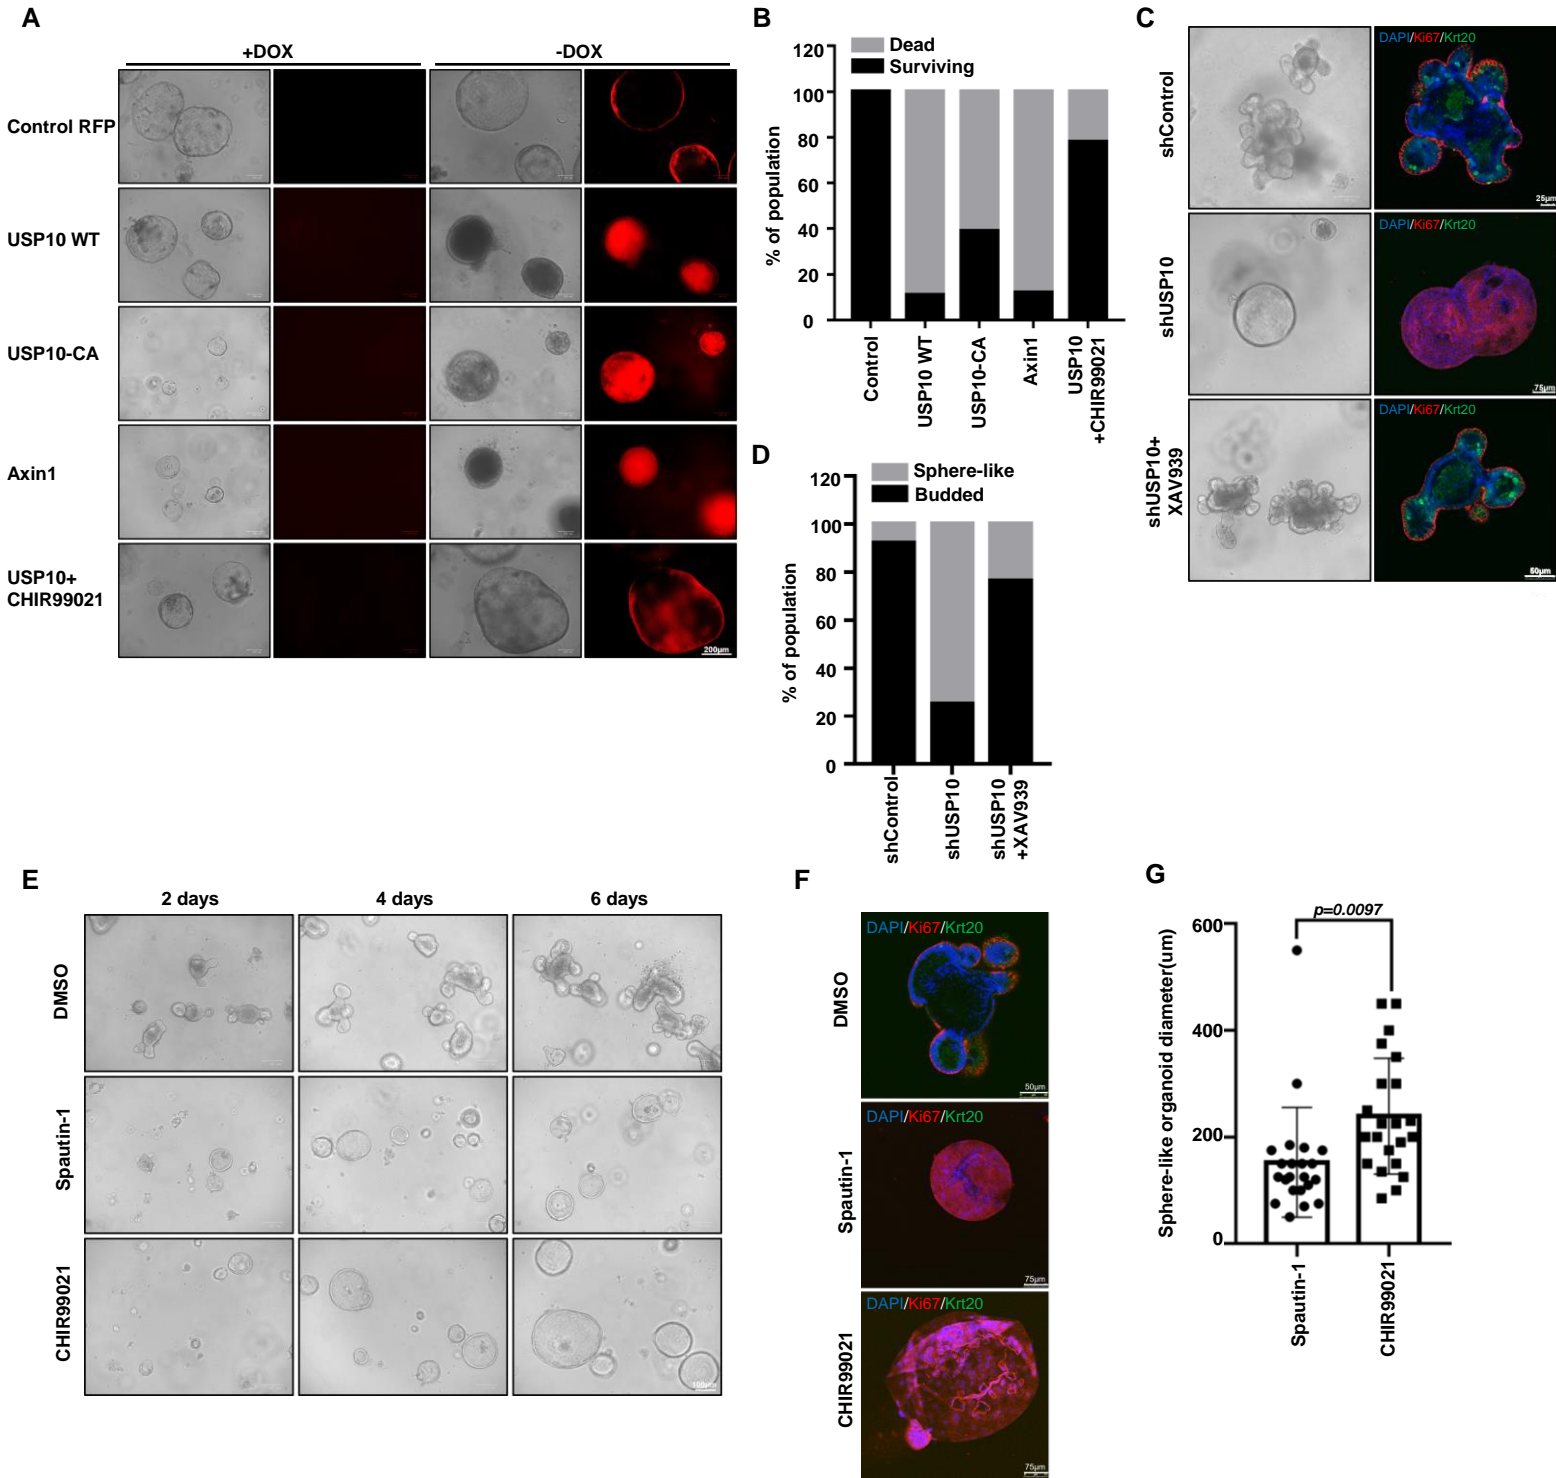

674 **Figure 6. USP10 critically regulates intestinal organoid homeostasis**

675 (A) Representative images (brightfield and red fluorescence) of murine intestinal

676 organoids under different conditions. Dox: doxycycline.

677 (B) Quantitative analysis of the surviving/dead organoids percentage in a. Control

678 group:n=65, USP10 WT group:n=71, USP10 CA group:n=67, Axin1 group:n=67,

679 USP10 WT+CHIR99021 group:n=60.

680 (C) Representative images (brightfield and immunofluorescence) of murine intestinal

681 organoids under USP10 depletion and XAV939 addition. Blue, DAPI; red, Ki67;

682 green, Krt20.

683 (D) Quantitative analysis of the surviving/dead organoids percentage in c. shControl

684 group:n=66, shUSP10 group:n=67, shUSP10+XAV939 group:n=68.

685 (E, F) Representative images (brightfield and immunofluorescence) of murine

686 intestinal organoids under DMSO, Spautin-1 or CHIR99021 treatment. Blue, DAPI;

687 red, Ki67; green, Krt20.

688 (G) Organoid (sphere-like) diameters quantifications in E shown by histogram. Error

689 bars mean  $\pm$  SD, n = 22, by two-tailed Student's t-test.

690 All images in any individual panel are in the same amplification scale except the

691 individually marked ones.

692



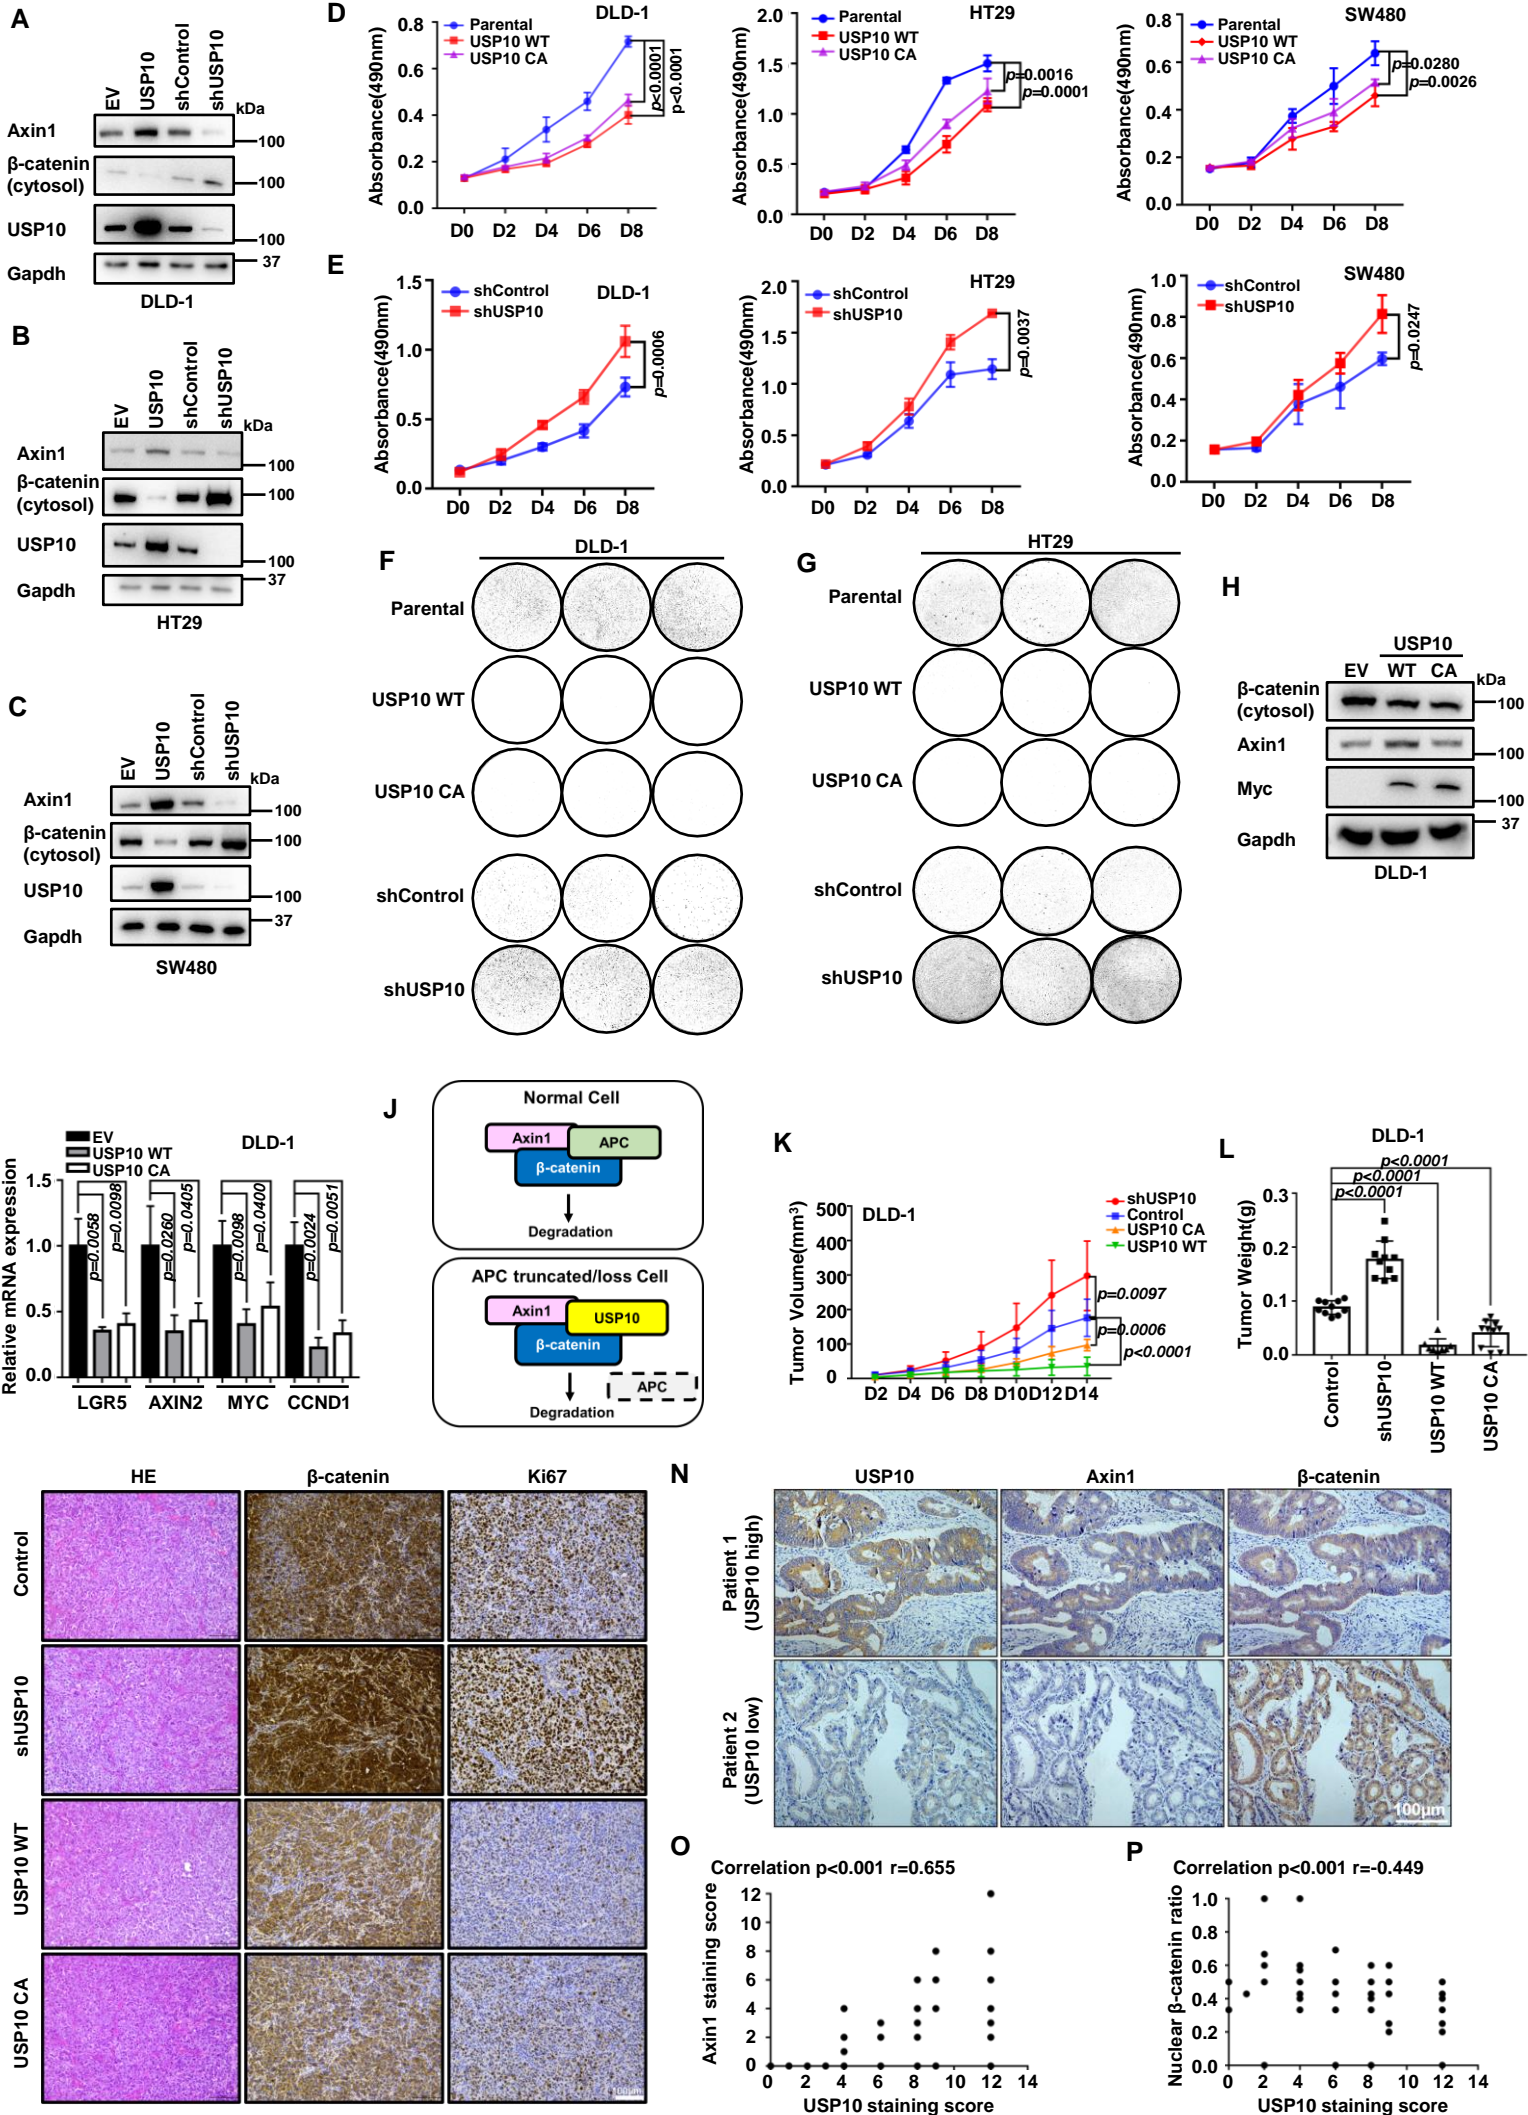

693 **Figure 7. USP10 suppresses CRC growth through inhibition of Wnt/ $\beta$ -catenin**  
694 **signaling.**

695 (A-C) Endogenous Axin1 and cytosolic  $\beta$ -catenin levels in CRC cell lines under  
696 USP10 overexpression or depletion condition. (A) DLD-1, (B) HT29, (C) SW480.  
697 (D, E) MTT cell growth assay of DLD-1, HT29 and SW480 cells under USP10 WT  
698 and USP10-CA overexpression (D) or USP10 depletion condition (E). Error bars  
699 mean  $\pm$  SD, n = 3, two-way ANOVA.

700 (F, G) Colony formation assays of DLD-1 (F) and HT29 (G) under USP10 WT/CA  
701 overexpression or USP10 depletion condition.

702 (H) Endogenous Axin1 and cytosolic  $\beta$ -catenin levels in DLD-1 cells with  
703 overexpression of WT USP10 and USP10-CA.

704 (I) RT-qPCR assay of Wnt target genes expression, including LGR5, AXIN2, MYC  
705 and CCND1 in DLD-1. Error bars mean  $\pm$  SD, n = 3, two-tailed Student's t-test.

706 (J) Proposed model of USP10 function in cells with loss-of-function APC. USP10  
707 predominantly compensate the scaffolding effect of APC by physically binding to  
708 both Axin1 and  $\beta$ -catenin and promoting phase separation.

709 (K, L) Quantitative analyses of the tumor volume (K) and weight (L) of  
710 subcutaneously transplanted DLD-1 cells. Tumor volume: Error bars mean  $\pm$  SD, n =  
711 10 for each group, by two-way ANOVA analysis. Tumor weight: Error bars mean  $\pm$   
712 SD, n = 10 for each group, by two-tailed Student's t-test analysis.

713 (M) Representative IHC staining images of  $\beta$ -catenin and Ki67 of the tumor formed  
714 from subcutaneously transplanted DLD-1 cell.

715 (N) Representative IHC staining images of Axin1 and  $\beta$ -catenin in CRC patients in  
716 USP10-high (upper row) and USP10-low (lower row) groups.

717 (O, P) The correlations of USP10 with Axin1 (O) and nuclear localized  $\beta$ -catenin ratio  
718 (P) in CRC patients. By two-tailed Spearman correlation analysis. All images in any  
719 individual panel are in the same amplification scale. ns, not significant.

720

721 **STAR Methods**

722 **Key reagents and resource**

| <b>REAGENT or RESOURCE</b>                          | <b>Source</b>             | <b>Identifier</b> |
|-----------------------------------------------------|---------------------------|-------------------|
| <b>Antibodies</b>                                   |                           |                   |
| USP10(D7A5) Rabbit mAb                              | Cell Signaling Technology | #8501             |
| Axin1(C76H11) Rabbit mAb                            | Cell Signaling Technology | #2087             |
| V5-Tag (D3H8Q) Rabbit mAb                           | Cell Signaling Technology | #13202            |
| Myc-Tag (9B11) Mouse mAb                            | Cell Signaling Technology | #2276             |
| DYKDDDDK Tag (D6W5B) Rabbit mAb                     | Cell Signaling Technology | #14793            |
| Anti-GFP Rabbit mAb                                 | Proteintech               | 50430-2-AP        |
| $\beta$ -Catenin (D10A8) XP <sup>®</sup> Rabbit mAb | Cell Signaling Technology | #8480             |
| $\beta$ -Catenin (L87A12) Mouse mAb                 | Cell Signaling Technology | #2698             |
| GSK-3 $\beta$ (27C10) Rabbit mAb                    | Cell Signaling Technology | #56500            |
| GSK-3 $\beta$ (3D10) Mouse mAb                      | Cell Signaling Technology | #9832             |
| Anti-Gapdh Rabbit                                   | Proteintech               | 10494-1-AP        |
| Ki-67 (8D5) Mouse mAb                               | Cell Signaling Technology | #9499             |
| KRT20 Rabbit pAb                                    | ABclonal                  | A17997            |
| Anti-mouse IgG, HRP-linked Antibody                 | Cell Signaling Technology | #7076             |
| Anti-rabbit IgG, HRP-linked Antibody                | Cell Signaling Technology | #7074             |
| $\beta$ -catenin (E5) Mouse mAb                     | Santa Cruz Biotechnology  | sc-7963           |

|                                                                                               |                              |            |
|-----------------------------------------------------------------------------------------------|------------------------------|------------|
| Goat anti-Rabbit IgG (H+L)<br>Highly Cross-Adsorbed<br>Secondary Antibody, Alexa<br>Fluor 488 | Invitrogen                   | A-11034    |
| Goat anti-Mouse IgG (H+L)<br>Highly Cross-Adsorbed<br>Secondary Antibody, Alexa<br>Fluor 555  | Invitrogen                   | A-21422    |
| Goat anti-Rabbit IgG (H+L)<br>Highly Cross-Adsorbed<br>Secondary Antibody, Alexa<br>Fluor 555 | Invitrogen                   | A-21429    |
| <b>Bacterial strand</b>                                                                       |                              |            |
| <i>E. coli</i> NEB® 5-alpha                                                                   | New England Biolabs<br>(NEB) | C2987H     |
| <i>E. coli</i> -BL21                                                                          | New England Biolabs<br>(NEB) | C2530H     |
| <b>Commercial chemicals and<br/>biologics</b>                                                 |                              |            |
| Cycloheximide                                                                                 | Sigma-Aldrich                | 5087390001 |
| CHIR99021                                                                                     | Cayman                       | 13122      |
| Thiazolyl Blue Tetrazolium<br>Bromide                                                         | Sigma-Aldrich                | M5655      |
| Hoechst                                                                                       | Thermo                       | 1990363    |
| Puromycin                                                                                     | Invivogen                    | ant-pr-1   |
| Geneticin                                                                                     | Invivogen                    | ant-gn-1   |

|                                                     |                          |           |
|-----------------------------------------------------|--------------------------|-----------|
| Gibco™ Penicillin-Streptomycin-Glutamine (100X)     | Gibco                    | 10378016  |
| Polybrene                                           | Santa Cruz Biotechnology | SC-134220 |
| MG132                                               | Beyotime Biotechnology   | S1748     |
| Spautin-1                                           | Beyotime                 | SC5498    |
| Poly-L-lysine                                       | Sango Biotech            | A600751   |
| Crystal violet                                      | Sango Biotech            | A100528   |
| Neofect™ DNA transfection reagent                   | Neofect                  | ME201901  |
| Ampicillin                                          | Sango Biotech            | A100339   |
| 4% paraformaldehyde                                 | Beyotime Biotechnology   | P0099     |
| Tris[(1-benzyl-1H-1,2,3-triazol-4-yl) methyl] amine | Sigma-Aldrich            | 678937    |
| Digitonin                                           | Sigma-Aldrich            | D141      |
| Triton X-100                                        | Sigma-Aldrich            | X100      |
| IGEPAL® CA-630                                      | Sigma-Aldrich            | I3021     |
| β-D-thiogalactoside (IPTG)                          | Beyotime Biotechnology   | ST098     |
| TrypLE™ Express Enzyme (1X), no phenol red          | Gibco                    | 12604021  |
| B-27™ Supplement (50X), minus vitamin A             | Gibco                    | 12587010  |
| N-2 Supplement (100X)                               | Gibco                    | 17502048  |
| EGF Recombinant Mouse Protein                       | Gibco                    | PMG8041   |
| N-Acetyl-L-cysteine                                 | Sigma-Aldrich            | A9165     |
| Nicotinamide                                        | Sigma-Aldrich            | N0636     |
| Y-27632                                             | Sigma-Aldrich            | Y0503     |

|                                                                                                      |                        |          |
|------------------------------------------------------------------------------------------------------|------------------------|----------|
| Recombinant Murine Noggin                                                                            | Peprotech              | 250-38   |
| Corning® Matrigel® Growth Factor Reduced (GFR) Basement Membrane Matrix, Phenol Red-free, *LDEV-free | Corning                | 356231   |
| PEG8000                                                                                              | Sango Biotech          | A600433  |
| Kanamycin sulfate                                                                                    | Sango Biotech          | A600286  |
| HEPES                                                                                                | Beyotime               | ST092    |
| Imidazole                                                                                            | Sigma-Aldrich          | I5513    |
| Reduced glutathione                                                                                  | Sigma-Aldrich          | V900456  |
| <b>Critical commercial assays/kits</b>                                                               |                        |          |
| Dual Luciferase Reporter Gene Assay Kit                                                              | Beyotime Biotechnology | RG027    |
| Endo-free Plasmid Mini Kit                                                                           | Omega                  | D6950    |
| UNIQ-10 Column Trizol Total RNA Isolation Kit                                                        | Sango Biotech          | B511321  |
| MonScript™ RTIII All-in-One Mix with dsDNase                                                         | Monad                  | MR05101M |
| MonAmp™ ChemoHS qPCR Mix                                                                             | Monad                  | MQ00401S |
| GeneJET Gel Extraction Kit                                                                           | Thermo                 | K0692    |
| GeneJET PCR Purification Kit                                                                         | Thermo                 | K0702    |
| Phanta Max Super-Fidelity DNA Polymerase                                                             | Vazyme                 | P505-d1  |

|                                                    |                                |                             |
|----------------------------------------------------|--------------------------------|-----------------------------|
| Chemistar™ High-sig ECL Western Blotting Substrate | Tanon                          | 180-5001                    |
| GST Fusion Protein Purification Kit                | Genscript                      | L00206                      |
| mMessage mMachine kit                              | Ambion                         | AM1348                      |
| MEGAscript Kit                                     | Ambion                         | AM1626                      |
| <b>Experimental models: Cell lines</b>             |                                |                             |
| HEK293T                                            | ATCC                           | CRL-11268<br>RRID:CVCL_1926 |
| HEK293T BAR/Renilla (B/R)                          | This study                     |                             |
| L cell                                             | ATCC                           | CRL-2648                    |
| L-Wnt3a cell                                       | ATCC                           | CRL-2647                    |
| RKO                                                | ATCC                           | CRL-2577                    |
| RKO BAR/Renilla (B/R)                              | This study                     |                             |
| DLD-1                                              | NCACC, China                   | TCHu134                     |
| DLD-1 BAR/Renilla (B/R)                            | This study                     |                             |
| HT29                                               | Procell                        | CL-0118                     |
| SW480                                              | NCACC, China                   | TCHu172                     |
| <b>Experimental models: Animals</b>                |                                |                             |
| BALB/cA-nude mice                                  | Beijing HFK Bioscience CO.,LTD | 13001A                      |
| C57BL/6J mice                                      | Beijing HFK Bioscience CO.,LTD | 11001A                      |
| Zebrafish wild-type Tubingen strain                | <sup>49</sup>                  |                             |

|                                     |            |                                                               |
|-------------------------------------|------------|---------------------------------------------------------------|
| Zebrafish <i>Tg(TOPdGFP)</i> strain | 49         |                                                               |
| <b>Oligonucleotides</b>             |            |                                                               |
| Control-shRNA sequence              | This study | AAAAAAAAAAAA<br>AAAAAAAAAA                                    |
| #1-shUSP10 sequence(human)          | 26         | GCCTCTCTTTAGT<br>GGCTCTTT                                     |
| #2-shUSP10 sequence(human)          | 26         | CCTATGTGGAAAC<br>TAAGTATT                                     |
| #1-shUSP10 sequence(mouse)          | 56         | CGCAGAGGAGTAT<br>CTAGGTTT                                     |
| #2-shUSP10 sequence(mouse)          | This study | GCAGAGTTATTGG<br>AGACTGTA                                     |
| #1-shAxin1 sequence(human)          | This study | CCCGTGTAATAT<br>GTACATTT                                      |
| #2-shAxin1 sequence(human)          | This study | GAGGAGAAGATC<br>ATCGGCAA                                      |
| CTNNB1-RT-qPCR primers              | This study | F:AAAGCGGCTGT<br>TAGTCACTGG<br>R:CGAGTCATTGC<br>ATACTGTCCAT   |
| AXIN2-RT-qPCR primers               | This study | F:AGCCAAAGCGA<br>TCTACAAAAGG<br>R:AAGTCAAAAAC<br>ATCTGGTAGGCA |
| LGR5-RT-qPCR primers                | This study | F:CTCCCAGGTCTG<br>GTGTGTTG                                    |



|                                        |               |                                                              |
|----------------------------------------|---------------|--------------------------------------------------------------|
|                                        |               | R:GAGGTCTAGGT<br>AGGAGGTGAAG                                 |
| MYC-RT-qPCR primers                    | This study    | F:GTCAAGAGGCG<br>AACACACAAC<br>R:TTGGACGGACA<br>GGATGTATGC   |
| CCND1-RT-qPCR primers                  | This study    | F:CAATGACCCCGC<br>ACGATTTC<br>R:CATGGAGGGCG<br>GATTGGAA      |
| GAPDH-RT-qPCR primers                  | This study    | F:GGAGCGAGATC<br>CCTCCAAAAT<br>R:GGCTGTTGTCAT<br>ACTTCTCATGG |
| USP10-RT-qPCR primers                  | This study    | F:GAGGGCACAGC<br>TACCAACG<br>R:AGGGGAGATAT<br>GGCGGGAG       |
| AXIN1-RT-qPCR primers                  | This study    | F:GGTTTCCCCTTG<br>GACCTCG<br>R:CCGTCGAAGTC<br>TCACCTTTAATG   |
| USP10 sgRNA sequence                   | <sup>56</sup> | GCCTGGGTACTGG<br>CAGTCGA                                     |
| USP10 sgRNA primer for sanger sequence | This study    | F:ACACTTTGCCGA<br>GAACC                                      |

|                                                 |            |                         |
|-------------------------------------------------|------------|-------------------------|
|                                                 |            | R:TAGCTGTAATAT<br>CCAGG |
| <b>Recombinant DNA</b>                          |            |                         |
| Lenti-EF1 $\alpha$ -puro Myc-USP10              | This study |                         |
| Lenti-EF1 $\alpha$ -puro Flag-Axin1             | This study |                         |
| Lenti-EF1 $\alpha$ -puro V5-Axin1               | This study |                         |
| Lenti-EF1 $\alpha$ -puro Flag- $\beta$ -catenin | This study |                         |
| Lenti-EF1 $\alpha$ -puro mCherry-Axin1          | This study |                         |
| Lenti-EF1 $\alpha$ -puro Flag-LRP6              | This study |                         |
| Lenti-EF1 $\alpha$ -puro HA-ZNRF3               | This study |                         |
| Lenti-EF1 $\alpha$ -puro GFP-APC                | This study |                         |
| Lenti-EF1 $\alpha$ -puro GFP-GSK3               | This study |                         |
| Lenti-EF1 $\alpha$ -puro Flag- $\beta$ -Trcp    | This study |                         |
| PGEX4T-1-USP10                                  | This study |                         |
| PGEX4T-1-Axin1                                  | This study |                         |
| pGIPZ-puro-tet-off-USP10                        | This study |                         |
| pGIPZ-puro-tet-off-Axin1                        | This study |                         |
| pLKO-puro shUSP10                               | This study |                         |
| pLKO-puro shAxin1                               | This study |                         |
| Lenti-EF1 $\alpha$ -puro V5-Ub                  | This study |                         |
| pCMV-VSV-G                                      | Addgene    | #8454                   |
| psPAX2                                          | Addgene    | #12260                  |
| pCS2 $\Delta$ N- $\beta$ -catenin               | This study |                         |
| pCS2 human DUB cDNA library                     | This study |                         |

|                                                |                          |                                                                                                                 |
|------------------------------------------------|--------------------------|-----------------------------------------------------------------------------------------------------------------|
| pcDNA3.1 SRE reporter                          | Addgene                  | #82686                                                                                                          |
| pGL3 BRE luciferase                            | Addgene                  | #45126                                                                                                          |
| pGL3 CAGA reporter                             | Gifted by Dr. Long Zhang | <sup>57</sup>                                                                                                   |
| 7TFP                                           | Addgene                  | #24308                                                                                                          |
| pGL3-Renilla luciferase                        | This study               |                                                                                                                 |
| pGL2 (basic) 3xARE Lux                         | Addgene                  | #14934                                                                                                          |
| pSV232AL-5xGal4-CREB-TATA                      | Addgene                  | #46756                                                                                                          |
| Lenti-Cas9-puro                                | Addgene                  | #108100                                                                                                         |
| Lenti-Cas9-puro sgUSP10                        | This study               |                                                                                                                 |
| pET28a                                         | Novagen                  | 69864                                                                                                           |
| pET28a-Axin1                                   | This study               |                                                                                                                 |
| pET28a- $\beta$ -catenin                       | This study               |                                                                                                                 |
| pGEX4T-1-Axin1-mCherry                         | This study               |                                                                                                                 |
| pGEX4T-1-USP10-GFP                             | This study               |                                                                                                                 |
| pGEX4T-1-USP10-CA-GFP                          | This study               |                                                                                                                 |
| pGEX4T-1-USP10- $\Delta$ DUB-GFP               | This study               |                                                                                                                 |
| pGEX4T-1-USP10- $\Delta$ DUB- $\Delta$ PBR-GFP | This study               |                                                                                                                 |
| <b>Software and algorithms</b>                 |                          |                                                                                                                 |
| Graphpad Prism 8                               | Graphpad software        | <a href="https://www.graphpad.com">https://www.graphpad.com</a>                                                 |
| ImageJ                                         | <sup>58</sup>            | <a href="https://imagej.nih.gov/ij/">https://imagej.nih.gov/ij/</a>                                             |
| PhotoShop CC2019                               | Adobe                    | <a href="https://www.adobe.com/cn/products/photoshop.html">https://www.adobe.com/cn/products/photoshop.html</a> |

|                                     |                          |                  |
|-------------------------------------|--------------------------|------------------|
| <b>Other</b>                        |                          |                  |
| Protein G Plus- Agarose             | Santa Cruz Biotechnology | SC-2002          |
| $\alpha$ -Myc Agarose Affinity Gel  | Sigma-Aldrich            | 7470             |
| $\alpha$ -Flag Agarose Affinity Gel | Sigma-Aldrich            | 4596             |
| EQKLISEEDL (Myc-tag) peptide        | Sangon Biotech           | Custom synthesis |
| Ni-NTA resin                        | Genscript                | L00250           |
| GST resin                           | Genscript                | L00206           |

723

#### 724 **Human specimen study approval**

725 The tissue microarrays of 92 cases of colon adenocarcinoma (OD-CT-DgCol04) were  
726 purchased from Shanghai Outdo Biotech Company, China. The research approach of  
727 immunohistochemical detection of protein expression in tissues of colon cancer has  
728 been approved by the Ethics Committee of China Medical University (Permission no:  
729 [2021] 206).

#### 730 **Animal work approval**

731 Mice: All mice (BALB/cA-nude and C57BL/6J ) were purchased from Beijing HFK  
732 Bioscience CO., LTD. Mice maintenance and treatments described were approved by  
733 the Research Ethics Committees of the College of Life and Health Sciences of  
734 Northeastern University (Approval no. NEU-EC-2021A018S and NEU-EC-  
735 2022A019S).

736 Zebrafish strains: The adult fishes were raised under standard conditions. Embryos  
737 were obtained from natural mating, which were grown at 28.5°C in Holtfreter's  
738 solution, and staged according to the morphology as previously described<sup>59</sup>. Adult  
739 wild-type (Tubingen strain) and *Tg(TOPdGFP)*<sup>49</sup> were used in this study. The  
740 experiments performed were approved by the Animal Care and Use Committee at the  
741 Institute of Zoology, Chinese Academy of Sciences (Permission Number: IOZ-  
742 13048).

#### 743 **Subcutaneous tumor transplantation**

744 DLD-1 cells were trypsinized and resuspended in DMEM. Nude mice (Beijing HFK  
745 Bioscience CO., LTD) were subcutaneously injected at a density of  $1 \times 10^6$  DLD-1  
746 cells per site, and the designed cell number and viability were determined using  
747 trypan blue.

#### 748 **Murine intestinal crypt isolation**

749 Mice after anesthesia treatment were sacrificed by cervical dislocation, and 2-3cm  
750 portions of the proximal intestine were collected, opened longitudinally and washed  
751 with ice-cold PBS. The luminal side was scraped to remove luminal contents and  
752 villous structures. After washing again with ice-cold PBS, the intestine was cut into 2-  
753 5mm pieces with scissors. The intestinal fragments were then incubated in 2mM  
754 EDTA/PBS on ice for 30min. EDTA was then removed, which was followed by 10mL  
755 of cold PBS addition for sequel manual suspension for 3min to release the crypt. The  
756 supernatant was collected and passed through a 70 $\mu$ m filter (FALCON) to remove  
757 tissue debris. After three washes with PBS and centrifugation at 600g to remove tissue  
758 debris, the crypts were enriched in the resulting pellet and subsequently embedded in  
759 Matrigel gels (Corning).

#### 760 **Cell lines**

761 This study utilized HEK293T (ATCC), DLD-1 (NCACC), RKO (ATCC) , HT29  
762 (Procell), SW480 (NCACC), L (ATCC) and L-Wnt3a (ATCC) cells. All cell lines  
763 were maintained in humidified incubators with 5% CO<sub>2</sub> at 37°C. HEK293T (parental  
764 and genetically modified), DLD-1 (parental and genetically modified), RKO (parental  
765 and genetically modified), SW480 (parental and genetically modified), L and L-  
766 Wnt3a cells were cultured in DMEM-High Glucose supplemented with 10% FBS  
767 (fetal bovine serum) and 100mg/mL of penicillin/streptomycin/glutamine (Gibco).  
768 HT29 cells (parental and genetically modified) were cultured in RPMI-1640 medium  
769 supplemented with 10% FBS and 100mg/mL of penicillin/streptomycin/glutamine  
770 (Gibco).

#### 771 **Clones and constructs**

772 Expressing Myc-tagged USP10 plasmids (wild-type and mutants), Flag-tagged Axin1  
773 plasmid (wild-type and mutants), Flag -tagged  $\beta$ -catenin plasmid (wild-type and  
774 mutants), mCherry-tagged Axin1 plasmids were constructed in customized Lenti-  
775 EF1 $\alpha$ -puro vector. Plasmids containing shControl, shUSP10 and shAxin1 were  
776 constructed in pLKO vector (primer sequence in reagent). Expressing GST-tagged  
777 USP10 plasmids (wild-type and mutants) and GST-tagged Axin1 plasmids (wild-type  
778 and mutants), GST-tagged USP10-GFP plasmids (wild-type and mutants) and GST-  
779 tagged Axin1-mCherry were constructed in pGEX-4T-1 vector. USP10 WT, USP10-  
780 CA, Axin1 were constructed in customized pGIPZ-tet-off-puro vector. His6-tagged  
781 Axin1 and His6-tagged  $\beta$ -catenin were constructed in pET28a vector. The plasmid  
782 containing sgUSP10 was constructed in Lenti-Cas9-puro vector (sequence in the  
783 reagent). All plasmids were transformed in *E. coli* NEB<sup>®</sup>5 $\alpha$  chain for amplification  
784 and extracted by OMEGA Endo-free Plasmid Mini Kit. The concentrations of all  
785 plasmids were determined by Thermo Nanodrop 2000.

#### 786 **Cell culture and transfection**

787 HEK293T, RKO, L and L-Wnt3a cells were purchased from ATCC. DLD-1 and  
788 SW480 cells were purchased from the NCACC, China. HT29 were purchased from  
789 Procell.

790 HEK293T (parental and genetically modified), RKO (parental and genetically  
791 modified), DLD-1 (parental and genetically modified), SW480 (parental and  
792 genetically modified), L and L-Wnt3a cells were cultured in DMEM medium  
793 supplemented with 10% FBS and 100mg/mL of penicillin/streptomycin/glutamine.  
794 HT29 cells (parental and genetically modified) were cultured in RPMI1640 medium  
795 with 10% FBS and 100mg/mL penicillin/streptomycin/glutamine.

796 Transfection was done using Neofect. Transient cDNA transfection was performed  
797 using Neofect according to the manufacturer's recommendations. Plasmids were  
798 diluted using DMEM and mixed with Neofect. The complexes were incubated for 20  
799 min at room temperature (RT) and added to HEK293T (parental or modified) cells in

800 growth medium. After 24-48hrs, cells were lysed using Passive Lysis Buffer (25mM  
801 Tris-HCl, 150mM NaCl, 0.5% CA630).

### 802 **Lentivirus production and infection**

803 For lentivirus production, psPAX2 (for packaging, Addgene) and pCMV-VSV-G (for  
804 enveloping, Addgene) and the desired plasmid constructed in the custom Lenti-EF1 $\alpha$ -  
805 puro vector or Lenti-Cas9-puro sgUSP10 were co-transfected in HEK293T cells at a  
806 mass ratio (ng) of 5:1:5. After transfection for 24hrs, the medium was carefully  
807 aspirated and replaced with fresh medium to produce virus-containing conditioned  
808 medium. Virus can be harvested at 48, 72, and 96hrs post transfection. For lentiviral  
809 infection, cell cultures were added to 0.5-1mL of conditioned medium containing  
810 virus, 1mL fresh medium and polybrene (Santa Cruz Biotech, 1:1000). After 48hrs,  
811 the medium was gently aspirated from the cells and replaced with fresh medium  
812 containing appropriate antibiotics for resistance selection.

### 813 **Cell line generation**

814 HEK293T BAR/Renilla (B/R) cell line, RKO BAR/Renilla (B/R) cell line and DLD-1  
815 BAR/Renilla (B/R) cell line: HEK293T cells, RKO cells or DLD-1 cells were  
816 infected with lentiviruses containing 7TFP and Renilla for 48hrs. After that, the  
817 medium was removed and replenished with fresh medium containing puromycin  
818 (Invivogen) and geneticin (Invivogen) for selection for 72hrs. Eventually, selected  
819 cells were cultured in normal medium and verified by dual luciferase reporter assay.  
820 USP10 KO cell lines: The selected sgRNA sequence  
821 (GCCTGGGTACTGGCAGTCGA) were cloned into Lenti-Cas9-puro vectors  
822 (Addgene). HEK293T or SW480 cells stably expressing Lenti-Cas9-puro sgUSP10  
823 were generated following lentiviral infection and puromycin resistance selection.  
824 After reaching confluency, cells were digested and diluted to approximately one  
825 cell/well, and seeded into 96-well plates to generate single clone in HEK293T or  
826 SW480 cells. Genotypes of single cell clones were determined by both sequencing  
827 DNA fragments containing targeted sgRNA regions amplified using sgUSP10 sanger

828 sequence PCR primers and immunoblotting against USP10 antibody (see Reagents or  
829 Resource).

### 830 **Antibodies and immunoblotting**

831 Antibodies were purchased from different companies (see detail in Reagents and  
832 Resources: Antibodies). Cells were lysed by passive lysis buffer (25mM Tris-HCl,  
833 150mM NaCl, 0.5% CA630) containing protease inhibitor cocktail (Roche). The cells  
834 were lysed in SDS loading buffer and boiled for 5-10min, followed by 8% or 10%  
835 poly-acrylamide gel for SDS-PAGE. For Western blotting, all primary antibodies were  
836 used at a 1:1000 dilution and all secondary antibodies were used at a 1:5000 dilution.  
837 Chemiluminescent substrate kit was purchased from GE and Tanon. Final  
838 quantification of gel intensity was done by ImageJ and plotted in Prism 8.0.

### 839 **Immunoprecipitation**

840 For co-immunoprecipitation, total lysates of cells were incubated with  $\alpha$ -Flag-agarose  
841 or  $\alpha$ -Myc-agarose overnight at 4°C. Next day, the resins were washed thoroughly five  
842 times with lysis buffer incubated and shaken for 10min at 4°C and resuspended in  
843 SDS loading buffer, boiled for 5min, used for the SDS-PAGE and Western blotting.

### 844 **Reverse transcription and quantitative real-time PCR**

845 UNIQ-10 Column Trizol Total RNA Isolation Kit (Sango Biotech) was used to extract  
846 total RNA from cells and reverse transcribed by MonScript™ RTIII All-in-One Mix  
847 with dsDNase (Monad) according to the manufacturer's protocol. Quantitative RT-  
848 PCR (qPCR, for RNA) and PCR (for genomic DNA) were performed using  
849 MonAmp™ ChemoHS qPCR Mix (Monad). All primers are designed based on the  
850 primer bank of Massachusetts General Hospital ([https://pga.mgh.harvard.edu/cgi-](https://pga.mgh.harvard.edu/cgi-bin/primerbank)  
851 [bin/primerbank](https://pga.mgh.harvard.edu/cgi-bin/primerbank)). All experiments were performed in triplicate. The expression values  
852 were normalized to those of GAPDH. PCR primer sequences are listed in the  
853 "Reagents or Resource".

### 854 **Pulse-chase assay**

855 The cells in 24-well plates (with 70-80% confluency) were treated with  
856 cycloheximide (Sigma-Aldrich) 300 $\mu$ g/mL at a range of time points (i.e., 0, 2, 4, 6,



857 8hrs). Cells were harvested at indicated time points and lysates were prepared and  
858 analyzed. Afterwards, the gel intensity was quantified by ImageJ and fitted into first  
859 order decay, and protein half-life ( $t_{1/2}$ ) was calculated according to  $\ln(N)-\ln(N_0) = -kt$   
860 linear equation.  $k$ =degradation rate constant ( $\text{min}^{-1}$ ).

#### 861 **L conditioned medium (LCM) and L-Wnt3a conditioned medium (Wnt3aCM)**

862 L cells and L-Wnt3a cells were grown in DMEM medium supplemented with 10%  
863 FBS. L cells expressing Wnt3a were cultured to 80-90% confluency and collected  
864 every 2 days for 6 days. Maximal activity was determined using the TOPFlash assay  
865 for subsequent Wnt stimulation experiments. Conditioned medium from L cells  
866 collected as control.

#### 867 **TOPFlash Dual-luciferase reporter assay**

868 For TOPFlash reporter assays, the TOPFlash reporter cell line (HEK293T B/R, cells  
869 containing stably expressed superTOPFlash (BAR) and *Renilla* (internal control)  
870 vectors) were used. Cells were seeded in 48-well plates and used Neofect for  
871 transfect, each set was repeated three times. For experiments requiring Wnt3a  
872 stimulation, the medium was changed to 1:1 mixed fresh medium and Wnt3aCM or  
873 LCM. After 18 hours of stimulation, dual-luciferase reporter assays were performed  
874 using the Dual Luciferase Reporter Assay Kit (Beyotime Biotechnology) according to  
875 the manufacturer's instructions. Plates ready for testing were measured by a Biotek  
876 Synergy H1 plate reader. Representative results consist of three (or more) independent  
877 experiments.

#### 878 **Cellular content fractionation**

879 Cell membranes and cytoplasm were separated using digitonin lysis buffer (25mM  
880 Tris-HCl, 150mM NaCl, 0.015% digitonin): first, cells were lysed using digitonin  
881 lysis buffer for 10min and centrifuged at 6124xg for 2min at 4°C, and the supernatant  
882 (cytoplasmic fraction) collected, resuspended in SDS loading buffer, boiled for 5min,  
883 used for the SDS-PAGE and Western blotting.

#### 884 ***In vivo* and *in vitro* deubiquitination assay**

885 For *in vivo* deubiquitination, V5-tagged Ub plasmid and other needed plasmids were  
886 transfected in HEK293T cells, and the cells were then treated overnight with 10 $\mu$ M  
887 proteasome inhibitor MG132 (Beyotime Biotechnology). These cells were lysed with  
888 cell lysis buffer after 48hrs and incubated with a certain amount of  $\alpha$ -Flag-agarose  
889 overnight at 4°C, and analyze by Western blotting.

890 For *in vitro* deubiquitination experiments, HEK293T cells were co-transfected with  
891 Flag-Axin1 and V5-Ub treated with 10 $\mu$ M MG132 overnight. After 48hrs, cells were  
892 lysed and 200 $\mu$ L was left as input, and the remaining whole cell lysate was incubated  
893 with a certain amount of Flag beads overnight at 4°C. After binding, the beads were  
894 washed with lysis buffer for later use. Meanwhile Myc-USP10 WT and Myc-USP10  
895 CA were expressed in HEK293T cells and purified using  $\alpha$ -Myc-agarose. Purified  
896 proteins were eluted with 100ng/mL Myc-tag peptide. Eluted USP10 WT or USP10  
897 CA proteins were then incubated with prepared Flag-Axin1 beads in deubiquitination  
898 buffer (50mM Tris-HCl, pH 7.4, 1mM MgCl<sub>2</sub> and 1mM DTT) for 2hrs at 37°C. The  
899 beads (Flag-Axin1) were washed five times by TBS with sufficient shaking during  
900 each interval and then analyzed by Western blotting.

#### 901 **Pull-down assay**

902 Preparation of GST fusion protein: Recombinant plasmids with the target gene in  
903 pGEX-4T-1 were transformed to *E. coli* BL21 competent cells. Protein expression  
904 was induced by addition of IPTG (Beyotime Biotechnology) and shaken at 3xg for 6-  
905 8hrs at 18°C. The bacterial solution was then collected, centrifuged, and the pellet was  
906 resuspended in 20 mL of ice lysis buffer (1mM PMSF, Tris, NaCl, and glycerol), and  
907 sonicated by SCIENTZ JY92-IIN sonicator on ice at 40% power for 5s each time at  
908 5s intervals for 20min. The bacterial solution after sonication was centrifuged at 4°C  
909 for 10min. Transfer the supernatant to a 50mL centrifuge tube. An appropriate amount  
910 of GST resins was added to the lysis buffer and incubated for 2-3hrs at 4°C with  
911 rotation. The binding beads were washed three times in ice-cold TBS and brought to  
912 volume with 1mL TBS (1mM PMSF) for GST-pull down experiments.

913 GST-pull down: GST-pull down analysis was performed to collect HEK293T cell  
914 lysates transferred with the target protein. A small amount of supernatant was  
915 obtained as input control, and the remaining lysate was added with beads coupled  
916 with GST-fusion expression protein and incubated overnight at 4°C. Beads were  
917 washed three times with lysis buffer, the supernatant was aspirated, and an appropriate  
918 amount of loading buffer, resuspended in SDS loading buffer, boiled for 5min, used  
919 for the SDS-PAGE and Western blotting.

920 Preparation of His6-tagged protein: The general protocol was the similar with GST-  
921 tagged protein preparation. The Ni-NTA resins were used to enrich His6-tagged  
922 protein and imidazole was used to elute. Imidazole was removed by dialysis at 4°C  
923 overnight.

#### 924 **Whole-mount *in situ* hybridization**

925 Digoxigenin-UTP-labeled antisense RNA probes were synthesized *in vitro* using the  
926 MEGAscript Kit (Ambion) according to the manufacturer's instructions. Whole-  
927 mount *in situ* hybridization (WISH) with the RNA probes was performed as  
928 previously described methods.<sup>60</sup>

#### 929 **RNA microinjections**

930 Capped mRNAs were synthesized *in vitro* for USP10, GFP from the corresponding  
931 linearized plasmids using the mMessage mMachine kit (Ambion) according to the  
932 manufacturer's instructions. The mRNA was injected into the embryos at 1-cell stage  
933 with a concentration of 500ng/μL or co-injected with 100ng/μL ΔN-β-catenin mRNA,  
934 1nL per embryo.

#### 935 **Chemical treatments**

936 The USP10 inhibitor, Spautin-1(Beyotime), was dissolved in DMSO with a  
937 concentration of 10mM as stock solution. HEK293T were treated with the inhibitor  
938 Spautin-1 at a final concentration of 10μM. Embryos were treated with the inhibitor  
939 Spautin-1 at a final concentration of 5μM or 10μM (diluted in Holtfreter's solution)  
940 form 8-cell stage. Intestinal organoids were treated with the inhibitor Spautin-1 at a

941 final concentration of 20 $\mu$ M, and then harvested at the indicated stage for further  
942 analysis.

### 943 **Mouse intestinal organoids culture**

944 The general process was described in <sup>50</sup>. Freshly isolated mouse crypts or single cells  
945 from dissociated mouse intestinal stem cell (ISC) colonies were embedded in Matrigel  
946 gels (Corning), which were cast into 20 $\mu$ L droplets at the bottom of wells in 96-well  
947 plate. Following polymerization (10min, 37°C), the gels were overlaid with 150 $\mu$ L of  
948 ISC expansion medium (Advanced DMEM/F12 containing Glutamax, HEPES,  
949 penicillin-streptomycin, B27, N2 (Gibco) ,1 $\mu$ M N-acetylcysteine (Sigma) and 10mM  
950 Nicotinamide (Sigma), supplemented with growth factors, including EGF (50ng/mL;  
951 Gibco), Wnt, Noggin, R-spondin1 (produced in-house), and small molecules,  
952 including CHIR99021 (5 $\mu$ M; Sigma) and Spautin-1 (20 $\mu$ M; Beyotime). The  
953 organoids were infected by lentivirus for 72hrs. The specific protocols were  
954 previously described.<sup>61</sup>

### 955 **Immunofluorescence analysis**

956 Mouse intestinal organoids embedded in Matrigel gels were fixed with 4%  
957 paraformaldehyde (PFA) in PBS (30min, room temperature). The fixation process  
958 typically led to complete degradation of the Matrigel. Suspended tissues were  
959 collected and centrifuged (61xg, 5min) to remove the PFA, washed with ultra-pure  
960 water and pelleted. Following resuspension in water, the organoids were spread on  
961 glass slides and allowed to attach by drying. Attached organoids were rehydrated with  
962 PBS. Following fixation, organoids spreaded on glass were permeabilized with 0.2%  
963 Triton X-100 in PBS (1h, room temperature) and blocked (10% goat serum in PBS  
964 containing 0.01% Triton X-100) for at least 3hrs. Samples were subsequently  
965 incubated overnight at 4°C with primary antibodies against Ki67 (1:50; CST #9499)  
966 and KRT20 (1:50; ABclonal A17997) diluted in blocking buffer. After washing with  
967 PBS for at least 3hrs, samples were incubated 2hrs at 4°C with secondary antibody  
968 (1:1000 in blocking solution; Invitrogen). Following extensive washing, stained  
969 organoids were imaged in confocal microscope (DM6000CS, Leica).

970 SW480 (parental or modified) cells were grown on glass coverslips. After growing to  
971 60% confluency, cells were washed three times with PBS and fixed in 4%  
972 paraformaldehyde (Sigma), followed by blocking in 5% BSA with 0.2% Triton X-100  
973 for 30min and incubation with primary antibody Axin1 (#2087, 1:200, Cell Signaling  
974 Technology) overnight. After that, secondary antibody (A-21429,1:500, Invitrogen)  
975 for 40min and nuclei were stained with Hoechst/DAPI (Thermo). Finally, samples  
976 were visualized using a confocal fluorescent microscope (DM6000CS, Leica).

#### 977 ***In vitro* droplet formation assays**

978 Axin1-mCherry, USP10 WT-GFP, USP10 CA-GFP, USP10- $\Delta$ DUB-GFP and USP10-  
979  $\Delta$ DUB- $\Delta$ PBR-GFP were transformed into *E. coli* BL21 strand for IPTG-induced  
980 expression (see Pull-down assay), followed by GST-resin packed column for  
981 purification. Reduced glutathione was used to elute the protein. After overnight  
982 dialysis at 4°C, the purified proteins were stored in phase separation buffer (20mM  
983 HEPES, 1M NaCl, pH 7.4). NaCl concentration was adjusted to the indicated  
984 concentration (150mM, pH 7.4) with buffer containing 20mM HEPES at the time of  
985 used. Mixtures were immediately treated with PEG8000 (Differences in the nature of  
986 phase separation between proteins determine the critical concentration at which  
987 droplets are formed).10 $\mu$ L of the reaction mixture was prepared; the concentration of  
988 NaCl was further adjusted to 150mM NaCl, and the mixture was dropped onto a glass  
989 slide and covered with a coverslip at the above concentration, allowed to stand for a  
990 few minutes, incubated, and then examined for droplet formation. For imaging,  
991 droplets were viewed on glass slides or in glass-bottom cell culture dishes for droplet  
992 and fluorescence imaging using ZOE<sup>TM</sup> Fluorescent Cell Imager (BIO-RAD).

#### 993 **Methyl thiazolyl tetrazolium (MTT) assay for cell proliferation**

994 Cells were seeded on 96-well plates at a density of 1000 cells per well in triplicate,  
995 incubated for 1-10 days, and cell density was measured on days 2, 4, 6, 8, and 10 after  
996 seeding. At each time point, 10 $\mu$ L of MTT (thiazolyl blue tetrazolium, from Sigma)  
997 was added to each well at a final concentration of 0.5mg/mL, and plates were  
998 incubated for an additional 4hrs at 37°C. After incubation, all MTT was removed and

999 100 $\mu$ L DMSO was added to each well. Plates ready for testing were measured after 10  
1000 minutes using a Biotek Synergy H1 plate reader at OD<sub>490</sub>. Growth curves were plotted  
1001 on a daily basis based on OD<sub>490</sub> values. Statistical analysis was done by two-way  
1002 analysis of variance in Prism 8.0.

### 1003 **Colony formation assay**

1004 At a density of 1000 cells /well, the DLD-1 cells were seeded in 6-well plates, and  
1005 then the cells were cultured in a 37°C incubator for 14 days to allow colony  
1006 formation. After the size and number of clones grew to a certain extent, the cells were  
1007 washed and treated with PBS, fixed with 4% paraformaldehyde for 30min, stained  
1008 with 0.5% crystal violet for 20min, washed with ddH<sub>2</sub>O several times and  
1009 photographed with a digital camera. All assays were performed in triplicate.

### 1010 **Cell migration assays**

1011 Cells were seeded into six-well plates. After reaching 95-100% cell density, 10 $\mu$ L  
1012 plastic pipette tips were then used to generate scratches in each well. CRC cells were  
1013 washed with PBS and then maintained in the medium containing 1% FBS. Wound  
1014 margins were photographed at 0, 24 and 48hrs. Cell migration ability was assessed by  
1015 measuring the distance between the advancing edges of cells in the microscopic field  
1016 at each time point. The formula was as follows: 24hrs migration% = (0hr width -  
1017 24hrs width of wound)/(0hr width of wound), 48hrs migration% = (0hr width - 48hrs  
1018 width of wound)/(0hr width of wound). All of the experiments were repeated three  
1019 times.

### 1020 **Growth of cells in athymic nude mouse and tumor size determination**

1021 DLD-1 cells were trypsinized, washed and resuspended in 0.1mL DMEM medium  
1022 without serum. Eighty 6-week-old female athymic mice (Beijing HFK Biotechnology  
1023 Co., Ltd.) were randomly divided into 8 groups (10 mice/group), and then the  
1024 designated cells ( $1 \times 10^6$ ) were subcutaneously injected into the plate. Tumor size was  
1025 determined every 2-3 days. Tumor volume was measured, and tumor volume was  
1026 calculated using each formula:  $\frac{1}{2} (\text{Length} \times \text{Width}^2)$ . Mice were then sacrificed and  
1027 tumors were excised, weighed and evaluated by immunohistochemistry.

1028 **Immunohistochemistry**

1029 Mouse immunohistochemistry tissue samples were fixed in 10% formalin, embedded  
1030 in paraffin, sectioned, deparaffinized, treated with 3% hydrogen peroxide for 10min,  
1031 submerging in citric acid (pH 6.0) and microwaved for antigen retrieval, and cooled at  
1032 room temperature (RT) and incubated in normal goat serum for 1hr to block non-  
1033 specific binding, then incubated with hematoxylin-eosin staining for 10min or  
1034 overnight at 4°C using the following primary antibodies:  $\beta$ -catenin (1:200, #8480,  
1035 Cell Signaling Technology), Ki67 (1:400, #9449, Cell Signaling Technology). The  
1036 staining was examined using HRP Envision Systems (DAB Kit, MXB  
1037 Biotechnologies) and analyzed using a dissecting microscope (Leica DM4000).  
1038 The human tissue microarrays were purchased from Shanghai Outdo Biotech  
1039 Company, China. After deparaffinizing in xylene and rehydrating in graded ethanol,  
1040 tissue microarrays were immersed in citrate buffer (USP10, Axin1) or EDTA ( $\beta$ -  
1041 catenin) for antigen retrieval. Endogenous peroxidase was quenched using 3%  
1042 hydrogen peroxide for 30min. To decrease the nonspecific staining, 10% normal goat  
1043 serum was subsequently used to block tissue collagen for 30min. Tissue sections were  
1044 then incubated with antibody anti-USP10 (#8501, 1:100, Cell Signaling Technology),  
1045 anti-Axin1 (#2087, 1:100, Cell Signaling Technology) or anti- $\beta$ -catenin (sc-7963,  
1046 1:500, Sigma) for 90min at room temperature (24-27°C) at 4°C overnight. After that,  
1047 biotinylated secondary antibody and streptavidin-biotin peroxidase were used to  
1048 incubate tissue sections for 10min each in turn. Slides were stained with DAB  
1049 chromogenic reagent for 60s, afterwards counterstained with hematoxylin.  
1050 UltraSensitive™ SPIHC Kit (KIT-9720, Maixin Inc., Fujian, China) were used in  
1051 this experiment.

1052 The stained sections were reviewed and scored by two investigators independently  
1053 and the different scoring was resolved after discussion. We adopted a semi-  
1054 quantitative scoring method to assess the expression of certain protein. The staining  
1055 intensity was divided into 0 (no staining), 1 (weak staining), 2 (moderate) and 3  
1056 (strong). The percentage of cells stained was categorized as 0 (0-5%), 1 (6-25%), 2

1057 (26-50%), 3 (51-75%), and 4 (76%-100%). The final scores were generated by  
1058 multiplying the staining intensity by percentage of cells.

### 1059 **Confocal laser scanning microscopy**

1060 All plasmid transfection fluorescence images were conducted on Olympus spinning  
1061 disk confocal microscope with an IX83 fully motorized inverted microscope and a  
1062 100XO UPLSAPO oil lens (numerical aperture 1.42) (Olympus). mCherry was  
1063 excited at 594 nm and detected at 610-710nm.

### 1064 **Fluorescence recovery after photobleaching (FRAP) experiments**

1065 Cells were firstly transfected with the plasmids of interest. After 2 days of transfection  
1066 and expression of the target proteins, the FRAP experiments of these cells were  
1067 conducted using a Fluoview FV3000 confocal laser scanning microscope with a  
1068 100XO UPLSAPO oil lens (numerical aperture 1.4) (Olympus). A granule of the  
1069 proteins of interests or a small region of the granule was selected and bleached using a  
1070 594nm argon laser at 100% intensity in five repeats with a dwell time of 50ms. Time-  
1071 lapse images were recorded with an interval of 0.09ms between each frame. FRAP  
1072 analysis was completed using the ImageJ FRAP Profiler plugin (from the Hardin lab:  
1073 <https://worms.zoology.wisc.edu/research/4d/4d.html#frap>). The mobile fraction ( $f_m$ )  
1074 and the immobile fraction ( $f_i$ ) was calculated by the following equations:

$$1075 f_m = F_\infty / F_0$$

1076 where  $F_\infty$  is the fluorescence intensity after full recovery, and  $F_0$  is the fluorescence  
1077 intensity before photobleaching.

$$1078 f_i = 1 - f_m$$

1079 FRAP curve was plotted with Prism 8 software, and  $t_{1/2}$  was calculated by fitting the  
1080 curve with exponential decay function.

### 1081 **Quantification and statistics**

1082 P-values were determined with Student's t-test, One-way or Two-way ANOVA with  
1083 post hoc Tukey's HSD test between comparator groups using GraphPad Prism  
1084 software based on the individual mathematic model of each data set.

1085 WB stripe quantification was performed by Image J:



1086 Using Image J→ Analyze→Gels→Plot Lanes to analyze the Western Blot results.  
1087 If statistical analysis is required, three independent experiments were performed and  
1088 quantified. Unpaired two-tailed Student's t-test was used to determine statistical  
1089 significance.  
1090 For the quantification of Axin1 puncta *in vitro*, maximum projections of 10 z-stack  
1091 images (0.9µm apart) were manually generated. For the quantification of Axin1  
1092 puncta *in vivo*, all images presented in the paper were z-stack maximum projections  
1093 using a step size of 0.27µm, spanning the entire depth of the nucleus. Puncta number  
1094 and diameter were analyzed using the software ImageJ. Unpaired two-tailed Student's  
1095 t-test was used to determine statistical significance.  
1096 TOPFlash assay: After the values were obtained according to the TOPFlash Dual-  
1097 luciferase reporter assay method, the fluorescence values of Firefly were divided by  
1098 the corresponding fluorescence values of Renilla (internal control). The values of EV  
1099 + LCM were used as control, and all the values were divided by the values of EV +  
1100 LCM for normalization, and the obtained results were used for image drawing.  
1101 Experimental results are shown as the mean ± SD, n=3 replicates, one-way ANOVA  
1102 or two-tailed Student's t-test was performed for statistical analysis.  
1103 MTT assay: The OD<sub>490</sub> values at each time point was used as the result for image  
1104 drawing. Experimental results are shown as the mean ± SD, n=3 replicates, two-way  
1105 ANOVA was performed for statistical analysis.  
1106 Quantitative real-time PCR: The gene expression values were normalized to those of  
1107 GAPDH. And data processing was performed using the  $2^{-\Delta\Delta Ct}$  method, the results  
1108 were calculated for image drawing. Experimental results are shown as the mean ± SD,  
1109 n=3 replicates, two-tailed Student's t-test was performed for statistical analysis.  
1110 Tumor volumes: Tumor volume was calculated using the formula:  $\frac{1}{2}$  (Length ×  
1111 Width<sup>2</sup>). Images were drawn after obtaining the tumor volumes in combination with  
1112 the corresponding time points. Experimental results are shown as the mean ± SD,  
1113 n=10 for each group, two-way ANOVA was performed for statistical analysis.

1114 Tumor weight: The tumor weight was measured after sacrificing the nude mice and  
1115 dissecting the tumor. Images were drawn based on the weight results. Experimental  
1116 results are shown as the mean  $\pm$  SD, n=10 for each group, two-tailed Student's t-test  
1117 was performed for statistical analysis.

1118 Endogenous Axin1 puncta in SW480 cells: each group selects three different visual  
1119 fields (25um), and counts the cells through ImageJ. Experimental results are shown as  
1120 the mean  $\pm$  SD, and n was labelled within the figures. Unpaired two-tailed Student's t-  
1121 test was used to determine statistical significance.

1122 *In vitro* droplet formation: puncta number and diameter of Axin1 were analyzed using  
1123 the software ImageJ. Experimental results are shown as the mean  $\pm$  SD, and n was  
1124 labelled within the figures. Unpaired two-tailed Student's t-test was used to determine  
1125 statistical significance.

1126 Colony number: Image J  $\rightarrow$  Type:8-bit  $\rightarrow$  Adjust:Threshold  $\rightarrow$  Analyze:Analyze  
1127 Particles to analyze the colony formation results.<sup>62</sup> Experimental results are shown as  
1128 the mean  $\pm$  SD. Unpaired two-tailed Student's t-test was used to determine statistical  
1129 significance.

## 1130 Reference

- 1131 1 MacDonald, B. T., Tamai, K. & He, X. Wnt/beta-catenin signaling: components,  
1132 mechanisms, and diseases. *Developmental cell* **17**, 9–26,  
1133 doi:10.1016/j.devcel.2009.06.016 (2009).
- 1134 2 Nusse, R. & Clevers, H. Wnt/beta-Catenin Signaling, Disease, and Emerging Therapeutic  
1135 Modalities. *Cell* **169**, 985–999, doi:10.1016/j.cell.2017.05.016 (2017).
- 1136 3 Storm, E. E. *et al.* Targeting PTPRK-RSPO3 colon tumours promotes differentiation and  
1137 loss of stem-cell function. *Nature* **529**, 97–100, doi:10.1038/nature16466 (2016).
- 1138 4 Bendell, J. *et al.* Initial results from a phase 1a/b study of OMP-131R10, a first-in-class  
1139 anti-RSPO3 antibody, in advanced solid tumors and previously treated metastatic  
1140 colorectal cancer (CRC). *Eur J Cancer* **69**, S29–S30, doi:Doi 10.1016/S0959-  
1141 8049(16)32668-5 (2016).
- 1142 5 Chartier, C. *et al.* Therapeutic Targeting of Tumor-Derived R-Spondin Attenuates beta-  
1143 Catenin Signaling and Tumorigenesis in Multiple Cancer Types. *Cancer research* **76**,  
1144 713–723, doi:10.1158/0008-5472.CAN-15-0561 (2016).
- 1145 6 Kakugawa, S. *et al.* Notum deacylates Wnt proteins to suppress signalling activity.  
1146 *Nature* **519**, 187–192, doi:10.1038/nature14259 (2015).
- 1147 7 Zhang, X. *et al.* Notum is required for neural and head induction via Wnt deacylation,  
1148 oxidation, and inactivation. *Developmental cell* **32**, 719–730,  
1149 doi:10.1016/j.devcel.2015.02.014 (2015).
- 1150 8 Flanagan, D. J. *et al.* NOTUM from Apc-mutant cells biases clonal competition to initiate  
1151 cancer. *Nature* **594**, 430–435, doi:10.1038/s41586-021-03525-z (2021).
- 1152 9 Ter Steege, E. J. & Bakker, E. R. M. The role of R-spondin proteins in cancer biology.  
1153 *Oncogene* **40**, 6469–6478, doi:10.1038/s41388-021-02059-y (2021).
- 1154 10 Nong, J. *et al.* Phase separation of Axin organizes the beta-catenin destruction complex.  
1155 *The Journal of cell biology* **220**, doi:10.1083/jcb.202012112 (2021).
- 1156 11 Kim, S. E. *et al.* Wnt stabilization of beta-catenin reveals principles for morphogen  
1157 receptor-scaffold assemblies. *Science* **340**, 867–870, doi:10.1126/science.1232389  
1158 (2013).
- 1159 12 Huang, S. M. *et al.* Tankyrase inhibition stabilizes axin and antagonizes Wnt signalling.  
1160 *Nature* **461**, 614–620, doi:10.1038/nature08356 (2009).
- 1161 13 Zhang, Y. *et al.* RNF146 is a poly(ADP-ribose)-directed E3 ligase that regulates axin  
1162 degradation and Wnt signalling. *Nature cell biology* **13**, 623–629, doi:10.1038/ncb2222  
1163 (2011).
- 1164 14 Callow, M. G. *et al.* Ubiquitin ligase RNF146 regulates tankyrase and Axin to promote  
1165 Wnt signaling. *PLoS one* **6**, e22595, doi:10.1371/journal.pone.0022595 (2011).
- 1166 15 Ji, L. *et al.* USP7 inhibits Wnt/beta-catenin signaling through promoting stabilization of  
1167 Axin. *Nature communications* **10**, doi:ARTN 4184  
1168 10.1038/s41467-019-12143-3 (2019).
- 1169 16 Ji, L. *et al.* The SIAH E3 ubiquitin ligases promote Wnt/beta-catenin signaling through  
1170 mediating Wnt-induced Axin degradation. *Genes Dev* **31**, 904–915,  
1171 doi:10.1101/gad.300053.117 (2017).

- 1172 17 Lui, T. T. *et al.* The ubiquitin-specific protease USP34 regulates axin stability and  
1173 Wnt/beta-catenin signaling. *Molecular and cellular biology* **31**, 2053-2065,  
1174 doi:10.1128/MCB.01094-10 (2011).
- 1175 18 Cha, B. *et al.* Methylation by protein arginine methyltransferase 1 increases stability of  
1176 Axin, a negative regulator of Wnt signaling. *Oncogene* **30**, 2379-2389,  
1177 doi:10.1038/onc.2010.610 (2011).
- 1178 19 Kim, S. & Jho, E. H. The protein stability of Axin, a negative regulator of Wnt signaling, is  
1179 regulated by Smad ubiquitination regulatory factor 2 (Smurf2). *The Journal of biological*  
1180 *chemistry* **285**, 36420-36426, doi:10.1074/jbc.M110.137471 (2010).
- 1181 20 Swatek, K. N. & Komander, D. Ubiquitin modifications. *Cell research* **26**, 399-422,  
1182 doi:10.1038/cr.2016.39 (2016).
- 1183 21 Bhattacharya, U., Neizer-Ashun, F., Mukherjee, P. & Bhattacharya, R. When the chains do  
1184 not break: the role of USP10 in physiology and pathology. *Cell Death Dis* **11**, 1033,  
1185 doi:10.1038/s41419-020-03246-7 (2020).
- 1186 22 Weisberg, E. L. *et al.* Inhibition of USP10 induces degradation of oncogenic FLT3. *Nature*  
1187 *chemical biology* **13**, 1207-1215, doi:10.1038/nchembio.2486 (2017).
- 1188 23 Sun, J. *et al.* USP10 inhibits lung cancer cell growth and invasion by upregulating PTEN.  
1189 *Mol Cell Biochem* **441**, 1-7, doi:10.1007/s11010-017-3170-2 (2018).
- 1190 24 Lu, C. *et al.* USP10 suppresses tumor progression by inhibiting mTOR activation in  
1191 hepatocellular carcinoma. *Cancer letters* **436**, 139-148, doi:10.1016/j.canlet.2018.07.032  
1192 (2018).
- 1193 25 Zhu, H. *et al.* USP10 Promotes Proliferation of Hepatocellular Carcinoma by  
1194 Deubiquitinating and Stabilizing YAP/TAZ. *Cancer research* **80**, 2204-2216,  
1195 doi:10.1158/0008-5472.CAN-19-2388 (2020).
- 1196 26 Yuan, J., Luo, K., Zhang, L., Chevill, J. C. & Lou, Z. USP10 regulates p53 localization and  
1197 stability by deubiquitinating p53. *Cell* **140**, 384-396, doi:10.1016/j.cell.2009.12.032  
1198 (2010).
- 1199 27 Liu, J. *et al.* Beclin1 controls the levels of p53 by regulating the deubiquitination activity  
1200 of USP10 and USP13. *Cell* **147**, 223-234, doi:10.1016/j.cell.2011.08.037 (2011).
- 1201 28 Deng, M. *et al.* Deubiquitination and Activation of AMPK by USP10. *Molecular cell* **61**,  
1202 614-624, doi:10.1016/j.molcel.2016.01.010 (2016).
- 1203 29 Lim, R. *et al.* Deubiquitinase USP10 regulates Notch signaling in the endothelium.  
1204 *Science* **364**, 188-+, doi:10.1126/science.aat0778 (2019).
- 1205 30 Liao, Y. *et al.* Inhibition of EGFR signaling with Spautin-1 represents a novel therapeutics  
1206 for prostate cancer. *J Exp Clin Cancer Res* **38**, 157, doi:10.1186/s13046-019-1165-4  
1207 (2019).
- 1208 31 Koo, B. K. *et al.* Tumour suppressor RNF43 is a stem-cell E3 ligase that induces  
1209 endocytosis of Wnt receptors. *Nature* **488**, 665-669, doi:10.1038/nature11308 (2012).
- 1210 32 Chen, M. *et al.* TMEM79/MATTRIN defines a pathway for Frizzled regulation and is  
1211 required for *Xenopus* embryogenesis. *eLife* **9**, doi:10.7554/eLife.56793 (2020).
- 1212 33 Madan, B. *et al.* USP6 oncogene promotes Wnt signaling by deubiquitylating Frizzleds.  
1213 *Proceedings of the National Academy of Sciences of the United States of America* **113**,  
1214 E2945-2954, doi:10.1073/pnas.1605691113 (2016).

- 1215 34 Lu, Y. *et al.* Twa1/Gid8 is a beta-catenin nuclear retention factor in Wnt signaling and  
1216 colorectal tumorigenesis. *Cell research* **27**, 1422-1440, doi:10.1038/cr.2017.107 (2017).
- 1217 35 Novellasdemunt, L. *et al.* USP7 Is a Tumor-Specific WNT Activator for APC-Mutated  
1218 Colorectal Cancer by Mediating beta-Catenin Deubiquitination. *Cell reports* **21**, 612-  
1219 627, doi:10.1016/j.celrep.2017.09.072 (2017).
- 1220 36 Tanneberger, K. *et al.* Structural and functional characterization of the Wnt inhibitor APC  
1221 membrane recruitment 1 (Amer1). *The Journal of biological chemistry* **286**, 19204-  
1222 19214, doi:10.1074/jbc.M111.224881 (2011).
- 1223 37 Rivera, M. N. *et al.* An X chromosome gene, WTX, is commonly inactivated in Wilms  
1224 tumor. *Science* **315**, 642-645, doi:10.1126/science.1137509 (2007).
- 1225 38 Major, M. B. *et al.* Wilms tumor suppressor WTX negatively regulates WNT/beta-catenin  
1226 signaling. *Science* **316**, 1043-1046, doi:10.1126/science/1141515 (2007).
- 1227 39 Schwarz-Romond, T. *et al.* The DIX domain of Dishevelled confers Wnt signaling by  
1228 dynamic polymerization. *Nature structural & molecular biology* **14**, 484-492,  
1229 doi:10.1038/nsmb1247 (2007).
- 1230 40 Musacchio, A. On the role of phase separation in the biogenesis of membraneless  
1231 compartments. *EMBO J* **41**, e109952, doi:10.15252/embj.2021109952 (2022).
- 1232 41 Tiwary, A. K. & Zheng, Y. X. Protein phase separation in mitosis. *Current Opinion in Cell*  
1233 *Biology* **60**, 92-98, doi:10.1016/j.ceb.2019.04.011 (2019).
- 1234 42 Davis, R. B., Moosa, M. M. & Banerjee, P. R. Ectopic biomolecular phase transitions:  
1235 fusion proteins in cancer pathologies. *Trends Cell Biol* **32**, 681-695,  
1236 doi:10.1016/j.tcb.2022.03.005 (2022).
- 1237 43 Banani, S. F., Lee, H. O., Hyman, A. A. & Rosen, M. K. Biomolecular condensates:  
1238 organizers of cellular biochemistry. *Nat Rev Mol Cell Bio* **18**, 285-298,  
1239 doi:10.1038/nrm.2017.7 (2017).
- 1240 44 Li, Y. *et al.* Volumetric Compression Induces Intracellular Crowding to Control Intestinal  
1241 Organoid Growth via Wnt/beta-Catenin Signaling. *Cell Stem Cell* **28**, 63-78 e67,  
1242 doi:10.1016/j.stem.2020.09.012 (2021).
- 1243 45 Martino-Echarri, E., Brocardo, M. G., Mills, K. M. & Henderson, B. R. Tankyrase Inhibitors  
1244 Stimulate the Ability of Tankyrases to Bind Axin and Drive Assembly of beta-Catenin  
1245 Degradation-Competent Axin Puncta. *PLoS one* **11**, e0150484,  
1246 doi:10.1371/journal.pone.0150484 (2016).
- 1247 46 Schneider, S., Steinbeisser, H., Warga, R. M. & Hausen, P. beta-Catenin translocation into  
1248 nuclei demarcates the dorsalizing centers in frog and fish embryos. *Mech Develop* **57**,  
1249 191-198, doi:10.1016/0925-4773(96)00546-1 (1996).
- 1250 47 Parker, D. S., Ni, Y. Y., Chang, J. L., Li, J. & Cadigan, K. M. Wingless signaling induces  
1251 widespread chromatin remodeling of target loci. *Molecular and cellular biology* **28**,  
1252 1815-1828, doi:10.1128/MCB.01230-07 (2008).
- 1253 48 Kelly, C., Chin, A. J., Leatherman, J. L., Kozlowski, D. J. & Weinberg, E. S. Maternally  
1254 controlled beta-catenin-mediated signaling is required for organizer formation in the  
1255 zebrafish. *Development* **127**, 3899-3911 (2000).

- 1256 49 Dorsky, R. I., Sheldahl, L. C. & Moon, R. T. A transgenic Lef1/beta-catenin-dependent  
1257 reporter is expressed in spatially restricted domains throughout zebrafish development.  
1258 *Dev Biol* **241**, 229-237, doi:10.1006/dbio.2001.0515 (2002).
- 1259 50 Sato, T. *et al.* Single Lgr5 stem cells build crypt-villus structures in vitro without a  
1260 mesenchymal niche. *Nature* **459**, 262-265, doi:10.1038/nature07935 (2009).
- 1261 51 Almeqdadi, M., Mana, M. D., Roper, J. & Yilmaz, O. H. Gut organoids: mini-tissues in  
1262 culture to study intestinal physiology and disease. *Am J Physiol Cell Physiol* **317**, C405-  
1263 C419, doi:10.1152/ajpcell.00300.2017 (2019).
- 1264 52 Sato, T. & Clevers, H. Growing self-organizing mini-guts from a single intestinal stem  
1265 cell: mechanism and applications. *Science* **340**, 1190-1194, doi:10.1126/science.1234852  
1266 (2013).
- 1267 53 Zhan, T., Rindtorff, N. & Boutros, M. Wnt signaling in cancer. *Oncogene* **36**, 1461-1473,  
1268 doi:10.1038/onc.2016.304 (2017).
- 1269 54 He, Y. *et al.* The deubiquitinase USP10 restores PTEN activity and inhibits non-small cell  
1270 lung cancer cell proliferation. *The Journal of biological chemistry* **297**, 101088,  
1271 doi:10.1016/j.jbc.2021.101088 (2021).
- 1272 55 Kim, K. *et al.* Prognostic significance of USP10 and p14ARF expression in patients with  
1273 colorectal cancer. *Pathol Res Pract* **216**, 152988, doi:10.1016/j.prp.2020.152988 (2020).
- 1274 56 Wang, X. *et al.* The deubiquitinase USP10 regulates KLF4 stability and suppresses lung  
1275 tumorigenesis. *Cell Death Differ* **27**, 1747-1764, doi:10.1038/s41418-019-0458-7  
1276 (2020).
- 1277 57 Dennler, S. *et al.* Direct binding of Smad3 and Smad4 to critical TGF beta-inducible  
1278 elements in the promoter of human plasminogen activator inhibitor-type 1 gene. *EMBO*  
1279 *J* **17**, 3091-3100, doi:10.1093/emboj/17.11.3091 (1998).
- 1280 58 Schneider, C. A., Rasband, W. S. & Eliceiri, K. W. NIH Image to ImageJ: 25 years of image  
1281 analysis. *Nat Methods* **9**, 671-675, doi:10.1038/nmeth.2089 (2012).
- 1282 59 Kimmel, C. B., Ballard, W. W., Kimmel, S. R., Ullmann, B. & Schilling, T. F. Stages of  
1283 embryonic development of the zebrafish. *Developmental dynamics : an official*  
1284 *publication of the American Association of Anatomists* **203**, 253-310,  
1285 doi:10.1002/aja.1002030302 (1995).
- 1286 60 Wei, S. *et al.* The guanine nucleotide exchange factor Net1 facilitates the specification of  
1287 dorsal cell fates in zebrafish embryos by promoting maternal beta-catenin activation.  
1288 *Cell Res* **27**, 202-225, doi:10.1038/cr.2016.141 (2017).
- 1289 61 Koo, B. K., Sasselli, V. & Clevers, H. Retroviral gene expression control in primary  
1290 organoid cultures. *Curr Protoc Stem Cell Biol* **27**, Unit 5A 6,  
1291 doi:10.1002/9780470151808.sc05a06s27 (2013).
- 1292 62 Cai, Z. L. *et al.* Optimized digital counting colonies of clonogenic assays using ImageJ  
1293 software and customized macros: Comparison with manual counting. *Int J Radiat Biol*  
1294 **87**, 1135-1146, doi:10.3109/09553002.2011.622033 (2011).

1295
